# Supplementary material for: Microbial decomposition of biodegradable plastics on the deep-sea floor
Source: PubMed Central journal article supplement (PMC10817984; doi:10.1038/s41467-023-44368-8), 2024-01-26
Supplement: 41467_2023_44368_MOESM1_ESM.pdf [file 41467_2023_44368_MOESM1_ESM.pdf]

# **Microbial Decomposition of Biodegradable Plastics on the Deep-sea Floor**

Taku Omura<sup>1</sup>, Noriyuki Isobe<sup>2</sup>, Takamasa Miura<sup>3</sup>, Shun'ichi Ishii<sup>4</sup>, Mihoko Mori<sup>3</sup>, Yoshiyuki Ishitani<sup>4</sup>, Satoshi Kimura<sup>1</sup>, Kohei Hidaka<sup>3</sup>, Katsuya Komiyama<sup>1</sup>, Miwa Suzuki<sup>5</sup>, Ken-ichi Kasuya<sup>5,6</sup>, Hidetaka Nomaki<sup>4</sup>, Ryota Nakajima<sup>7</sup>, Masashi Tsuchiya<sup>7</sup>, Shinsuke Kawagucci<sup>7</sup>, Hiroyuki Mori<sup>8</sup>, Atsuyoshi Nakayama<sup>9</sup>, Masao Kunioka<sup>10</sup>, Kei Kamino<sup>3</sup> and Tadahisa Iwata<sup>1\*</sup>

<sup>1</sup> Laboratory of Science of Polymeric Materials, Department of Biomaterial Sciences, Graduate School of Agricultural and Life Sciences, The University of Tokyo, 1-1-1 Yayoi, Bunkyo-ku, Tokyo 113-8657, Japan

<sup>2</sup> Research Institute for Marine Resources Utilization, Japan Agency for Marine-Earth Science and Technology (JAMSTEC), 2-15 Natsushima-cho, Yokosuka, Kanagawa 237-0061, Japan

<sup>3</sup> Biological Resource Center, National Institute of Technology and Evaluation (NBRC), 2-5-8 Kazusakamatari, Kisarazu, Chiba 292-0818, Japan

<sup>4</sup> Institute for Extra-cutting-edge Science and Technology Avant-garde Research (X-STAR), Japan Agency for Marine-Earth Science and Technology (JAMSTEC), 2-15 Natsushima-cho, Yokosuka, Kanagawa 237-0061, Japan

<sup>5</sup> Gunma University Center for Food Science and Wellness (GUCFW), Maebashi, Gunma 371-8510, Japan

<sup>6</sup> Green Polymer Research Laboratory, Graduate School of Science and Technology, Gunma University, Kiryu, Gunma 376-8515, Japan

<sup>7</sup> Research Institute for Global Change (RIGC), Japan Agency for Marine-Earth Science and Technology (JAMSTEC), 2-15 Natsushima-cho, Yokosuka, Kanagawa 237-0061, Japan

<sup>8</sup> Japan BioPlastics Association (JBPA), 5-11 Nihonbashi Hakozaiki-cho, Chuo-ku, Tokyo 103-0015, Japan

<sup>9</sup> Biomedical Research Institute, National Institute of Advanced Industrial Science and Technology (AIST), 1-8-31 Midorigaoka, Ikeda, Osaka 563-8577, Japan

<sup>10</sup> Standardization Promotion Office, National Institute of Advanced Industrial Science and Technology (AIST), 1-1-1 Umezono, Tsukuba, Ibaraki 305-8560, Japan

\*All correspondence should be addressed to:

Tadahisa Iwata, [atiwata@g.ecc.u-tokyo.ac.jp](mailto:atiwata@g.ecc.u-tokyo.ac.jp), +81-3-5841-5266

## Supplementary Figures

**Supplementary Fig. 1.** Chemical structure of PHA, biodegradable polyesters, polysaccharide esters derivatives and non-biodegradable common plastics.

**Supplementary Fig. 2.** Deployment and recovery set-up at PJM, BHT, BMS, BMJ, and AKR

**Supplementary Fig. 3.** Deployment and recovery set-up at AMN

**Supplementary Fig. 4.** Research vehicles employed in the deployment and recovery of samples

**Supplementary Fig. 5.** Photographs of film samples, graphs of weight loss and film thickness loss, and surface SEM images before and after decomposition for a, PHB and b, PHBV.

**Supplementary Fig. 6.** Photographs of film samples, graphs of weight loss and film thickness loss, and surface SEM images before and after decomposition for c, P3HB4HB and d, PCL.

**Supplementary Fig. 7.** Photographs of film samples, graphs of weight loss and film thickness loss, and surface SEM images before and after decomposition for e, PBS and f, PBAT.

**Supplementary Fig. 8.** Photographs of film samples, graphs of weight loss and film thickness loss, and surface SEM images before and after decomposition for g, PE and h, PS.

**Supplementary Fig. 9.** Photographs of film samples, graphs of weight loss and film thickness loss, and surface SEM images before and after decomposition for i, PET.

**Supplementary Fig. 10.** SEM images of four PHA films placed on the BHT site for three months. Color 3D maps of surface roughness and attached micro-organism images are shown in pairs.

**Supplementary Fig. 11.** SEM images of five types of biodegradable polyesters films placed on the BHT site for three months. Surface roughness images by color 3D mapping and microstructures of attached bacteria are shown in pairs (Note that the 3D map magnification was larger than that of the PHA films because of their slow biodegradation).

**Supplementary Fig. 12.** SEM images of four types of common plastic films placed on the BHT site for three months. Surface roughness images by color 3D mapping and microstructures of attached bacteria are shown in pairs (Note that the 3D map magnification was larger than that of the PHA films because of their slow biodegradation).

**Supplementary Fig. 13.** 16S rRNA gene-based prokaryotic community composition of biofilms from PHA, biodegradable polyesters, and non-biodegradable common plastics, at the family-level.

**Supplementary Fig. 14.** Metagenome-based microbial community compositions of plastsphere established on various plastics at the sea.

**Supplementary Fig. 15.** Metagenomic assembly of deep-seawater and sediment microbiomes near plastic degradation test at site BHT.

**Supplementary Fig. 16.** Metagenome-based microbial community compositions of plastsphere compared with surrounding deep seawater and sediment under the plastic chamber at site BHT.

**Supplementary Fig. 17.** Comparison of microbial community compositions among plastspheres, the deep-sea microbiome, and sediments at site BHT.

**Supplementary Fig. 18.** Polysaccharide-associated bacterial communities vary by degree of acetylation, site, and immersion period.

**Supplementary Fig. 19.** 16S rRNA gene-based prokaryotic community composition of polysaccharides and common plastics at the family level.

**Supplementary Fig. 20.** Comparison of microbial community compositions of the plastispheres based on a multidimensional scale plot.

**Supplementary Fig. 21.** Phylogenetic tree of single-copy housekeeping gene, ribosomal protein S3, RpsC, identified in plastisphere metagenomes at the sea.

**Supplementary Fig. 22.** Shade plot illustrating the relative abundances (%) of plastic-specific amplicon sequence variants (ASVs) at different sites and periods of immersion

**Supplementary Fig. 23.** Heatmap of the 50 most abundant ASVs in biofilms obtained from all polysaccharides and non-biodegradable common plastics.

**Supplementary Fig. 24.** Shade plot illustrating the relative abundances of plastic specific metagenome-assembled genomes (MAGs) at different sites and periods of immersion.

**Supplementary Fig. 25.** Additional information for MAGs of dominant microbes within plastisphere established on biodegradable polyesters at the sea.

**Supplementary Fig. 26.** Genome clustering from metagenome sequences of plastisphere for PHB and PHBV established under oceanic condition.

**Supplementary Fig. 27.** Genome clustering from metagenome sequences of plastisphere for PHBH and P3HB4HB established under oceanic condition.

**Supplementary Fig. 28.** Genome clustering from metagenome sequences of plastisphere for PBAT and PBSA established under oceanic condition.

**Supplementary Fig. 29.** Genome clustering from metagenome sequences of plastisphere for PCL and PLLA established under oceanic condition.

**Supplementary Fig. 30.** Genome clustering from metagenome sequences of plastisphere for PET and PE established under oceanic condition.

**Supplementary Fig. 31.** Genome clustering from metagenome sequences of plastisphere for PS and PP established under oceanic condition.

Supplementary Tables

**Supplementary Table 1.** Detail of samples placed for 3 months at BHT (BHT03).

**Supplementary Table 2.** Detail of samples placed for 8 months at BHT (BHT08).

**Supplementary Table 3.** Biodegradation rate of injection-molded plastic samples.

**Supplementary Table 4.** Biodegradation rates of various melt-pressed PHA and biodegradable polyester films.

**Supplementary Table 5.** Detail of samples placed for 2 months at PJM (PJM02).

**Supplementary Table 6.** Detail of samples placed for 5 months at BMS (BMS05).

**Supplementary Table 7.** The weight-loss of polysaccharide esters derivatives films.

**Supplementary Table 8.** Stats for metagenomic assemblies of plastisphere at the sea.

**Supplementary Table 9.** Minimum information of metagenome-assembled genome (MiMAG) and GBDBtk taxonomy of MAGs.

**Supplementary Table 10.** Information of raw sequence data for 16S rRNA gene amplicon sequencing and metagenomic sequencing.

### Polyhydroxyalkanoates

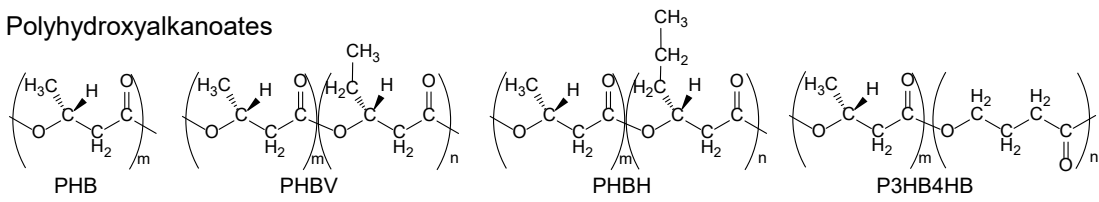

### Biodegradable polyesters

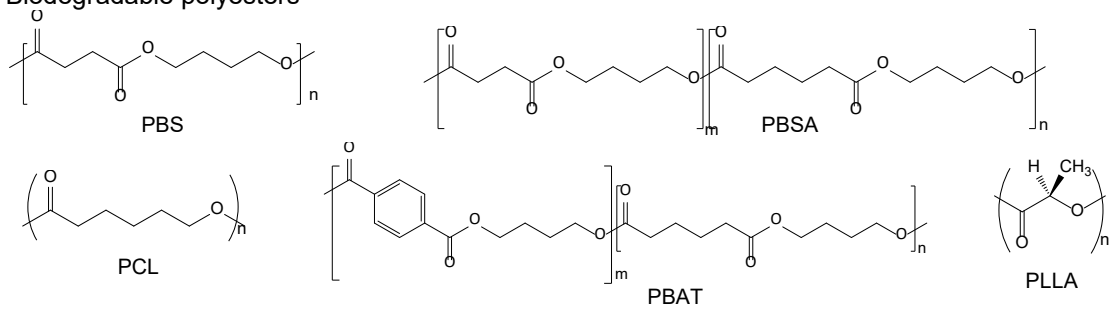

### Polysaccharide ester derivatives

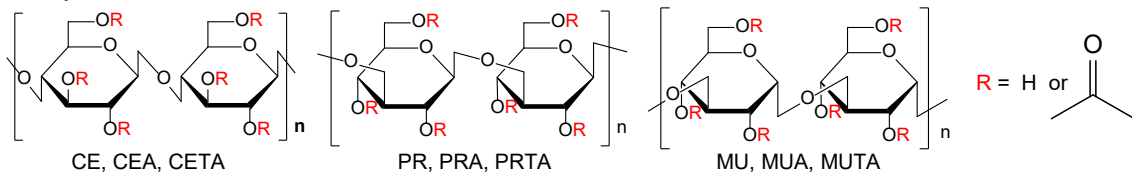

### Non-biodegradable common plastics

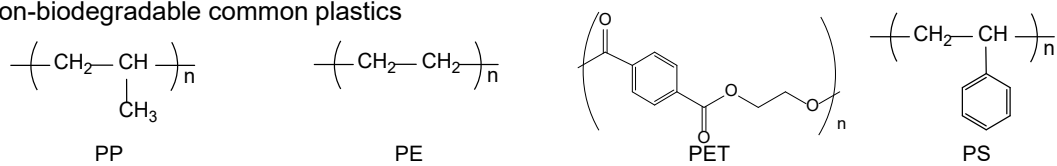

**Supplementary Fig. 1 | Chemical structure of PHA, biodegradable polyesters, polysaccharide ester derivatives and non-biodegradable common plastics.**

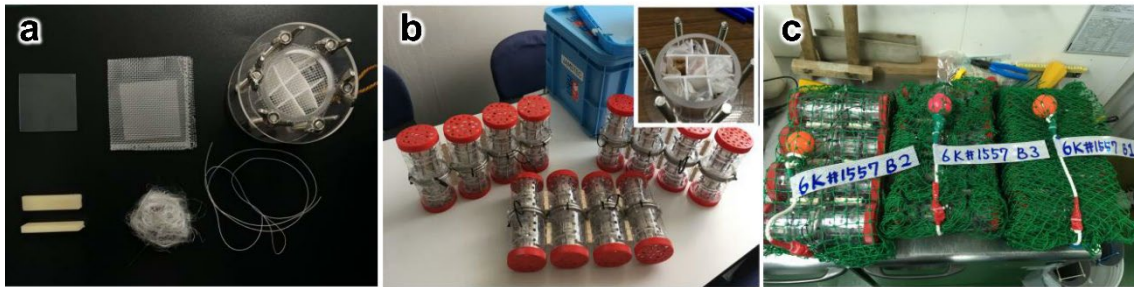

**Supplementary Fig. 2 | Deployment and recovery set-up at PJM, BHT, BMS, BMJ, and AKR**

**a**, sample specimen used for the on-site degradation tests at BHT, BMS, BMJ, and AKR, which were stored in the sample holder, **b**, sample chambers where the sample holder (inset) were stored and **c**, sample chambers covered with protective nets and tagged with buoy.

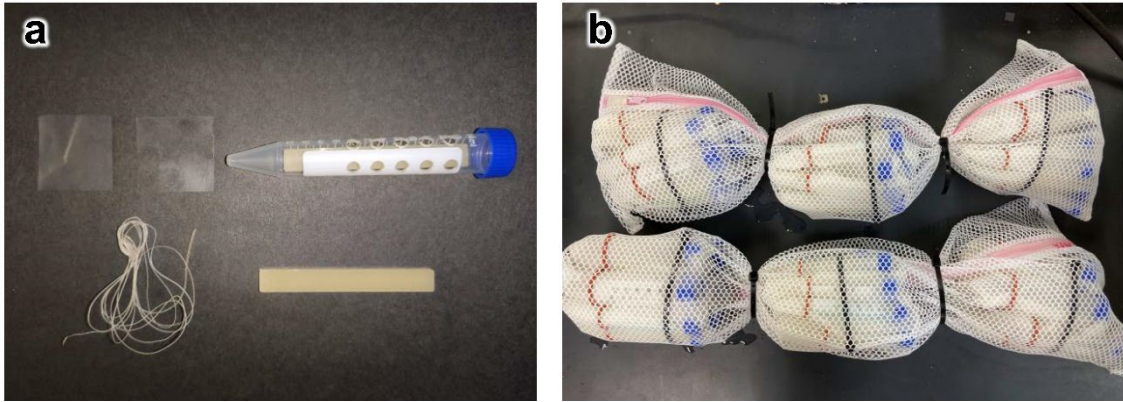

**Supplementary Fig. 3 | Deployment and recovery set-up at AMN**

**a**, sample specimen used for the on-site degradation tests at AMN, which were stored in the centrifuge tubes with holes used as a sample holder and **b**, sample holders covered with protective nets.

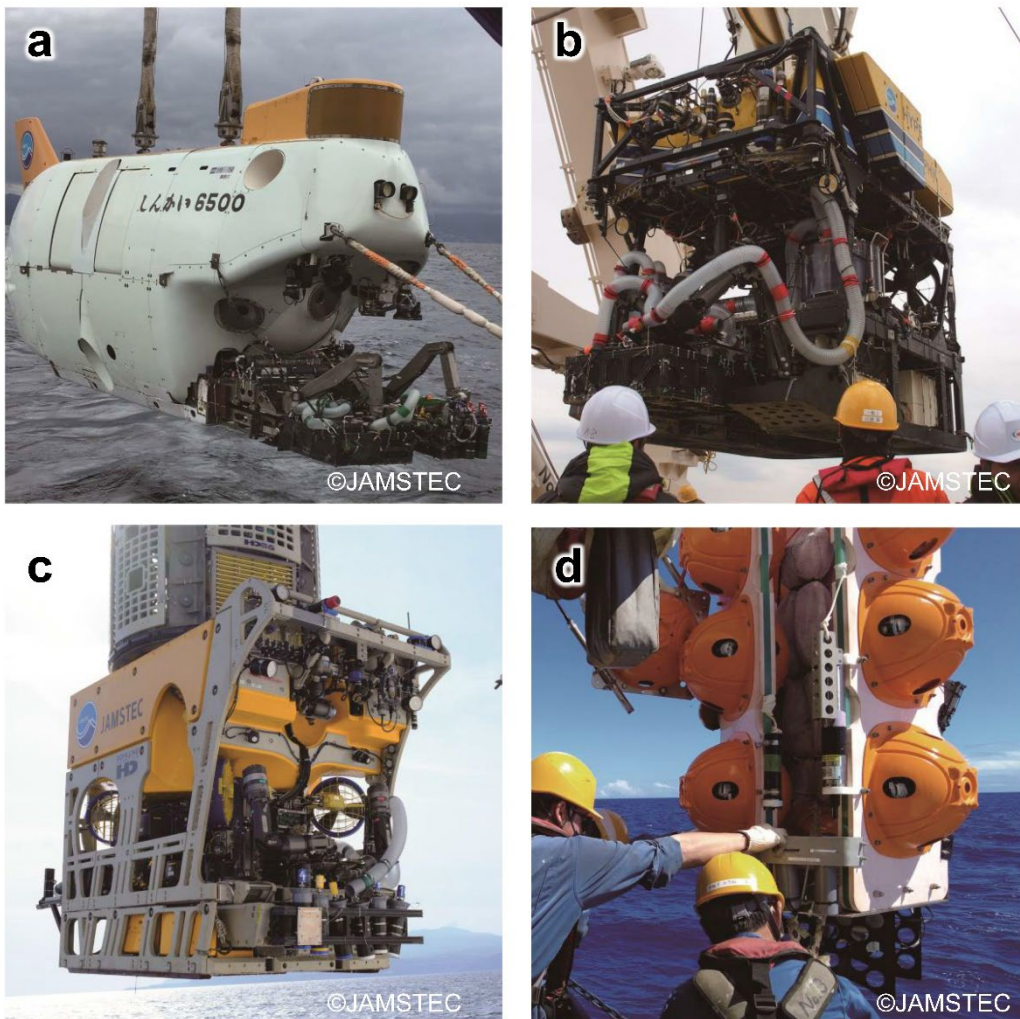

**Supplementary Fig. 4 | Research vehicles employed in the deployment and recovery of samples**  
**a**, human occupied vehicle (HOV) *Shinkai 6500*, **b**, remotely operated vehicles (Hyper-Dolphin), **c**, remotely operated vehicles (Kaimei-ROV) and **d**, the free-fall-type deep-sea observatory lander system Edokko Mark 1 employed at AMN. The photos were taken by the authors of this work and are used in accordance with the data use policy of the Japan Agency for Marine Earth Science and Technology ([https://www.jamstec.go.jp/e/database/data\\_policy.html](https://www.jamstec.go.jp/e/database/data_policy.html)).



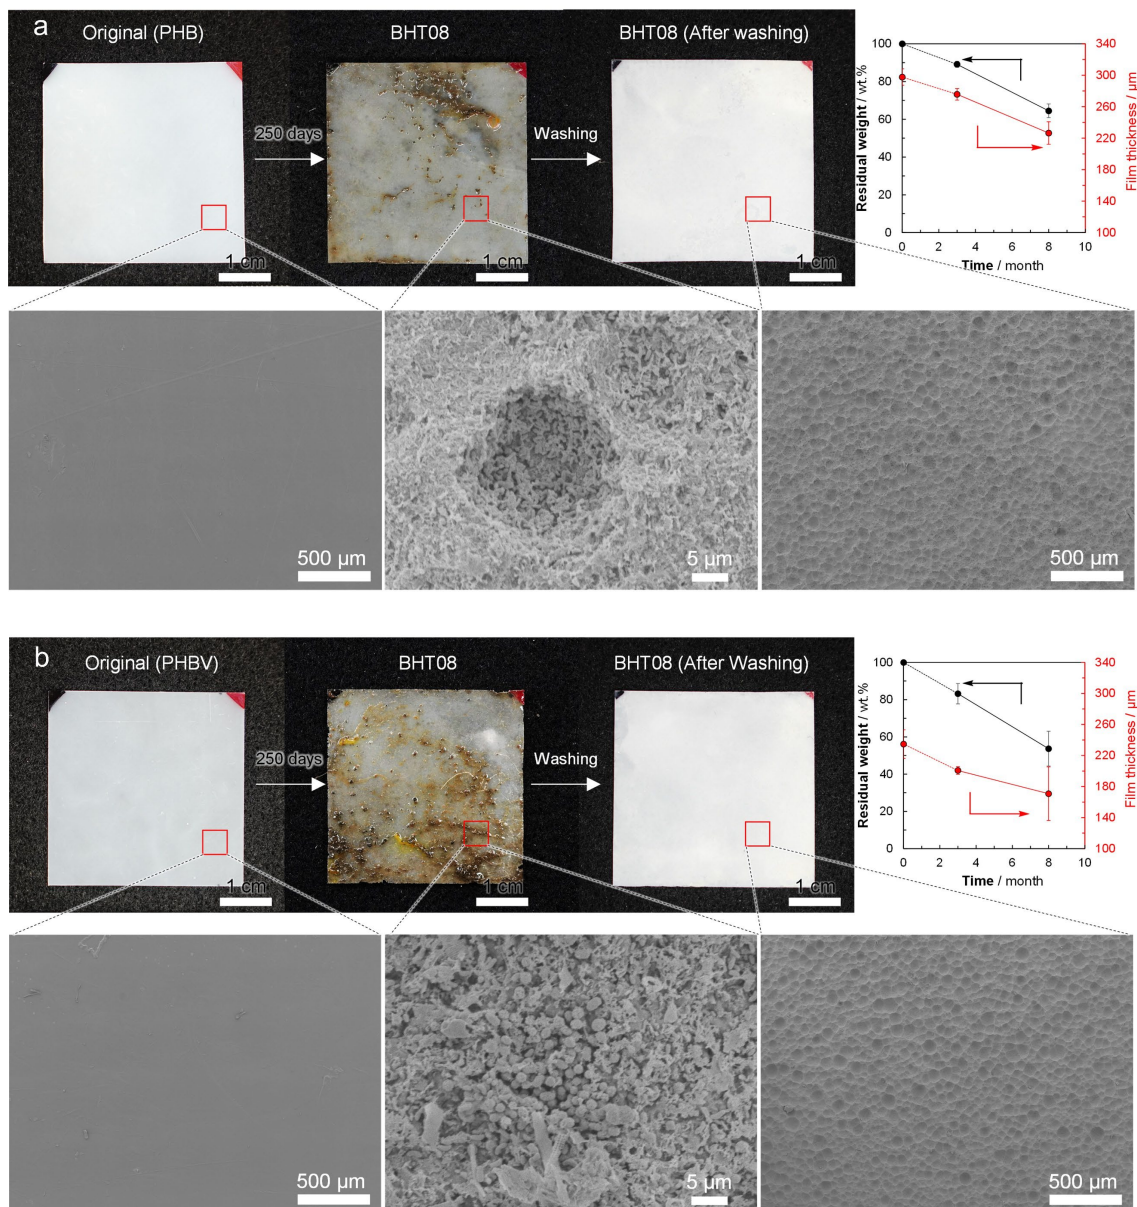

**Supplementary Fig. 5 | Photographs of film samples, graphs of weight loss and film thickness loss, and surface SEM images before and after decomposition for a, poly[(*R*)-3-hydroxybutyrate] (PHB) and b, poly[(*R*)-3-hydroxybutyrate-co-12 mol%-(*R*)-3-hydroxyvalerate] (PHBV).**

After 250 days of deployment at 855 m (the deep-sea floor) off Hatsushima Island (BHT08), the recovered films were ultrasonically washed to remove biofilm, vacuum dried, and then evaluated for weight loss (black line) and film thickness decrease (red line). Values are given as average of  $n = 4$  independent samples with its standard deviation (Supplementary Data 1). The scanning electron microscope (SEM) images show a magnified view of the surface of each film. While the surface of the original sample was smooth, microorganisms accumulated on the surface of the BHT08 sample, and the surface of the film after the microorganisms were removed by ultrasonic washing (BHT08 After washing) showed roughness typically observed following microbial degradation. The micrographs are representative images from  $n = 3$  independent samples with similar results. Source data are provided as a Source Data file.

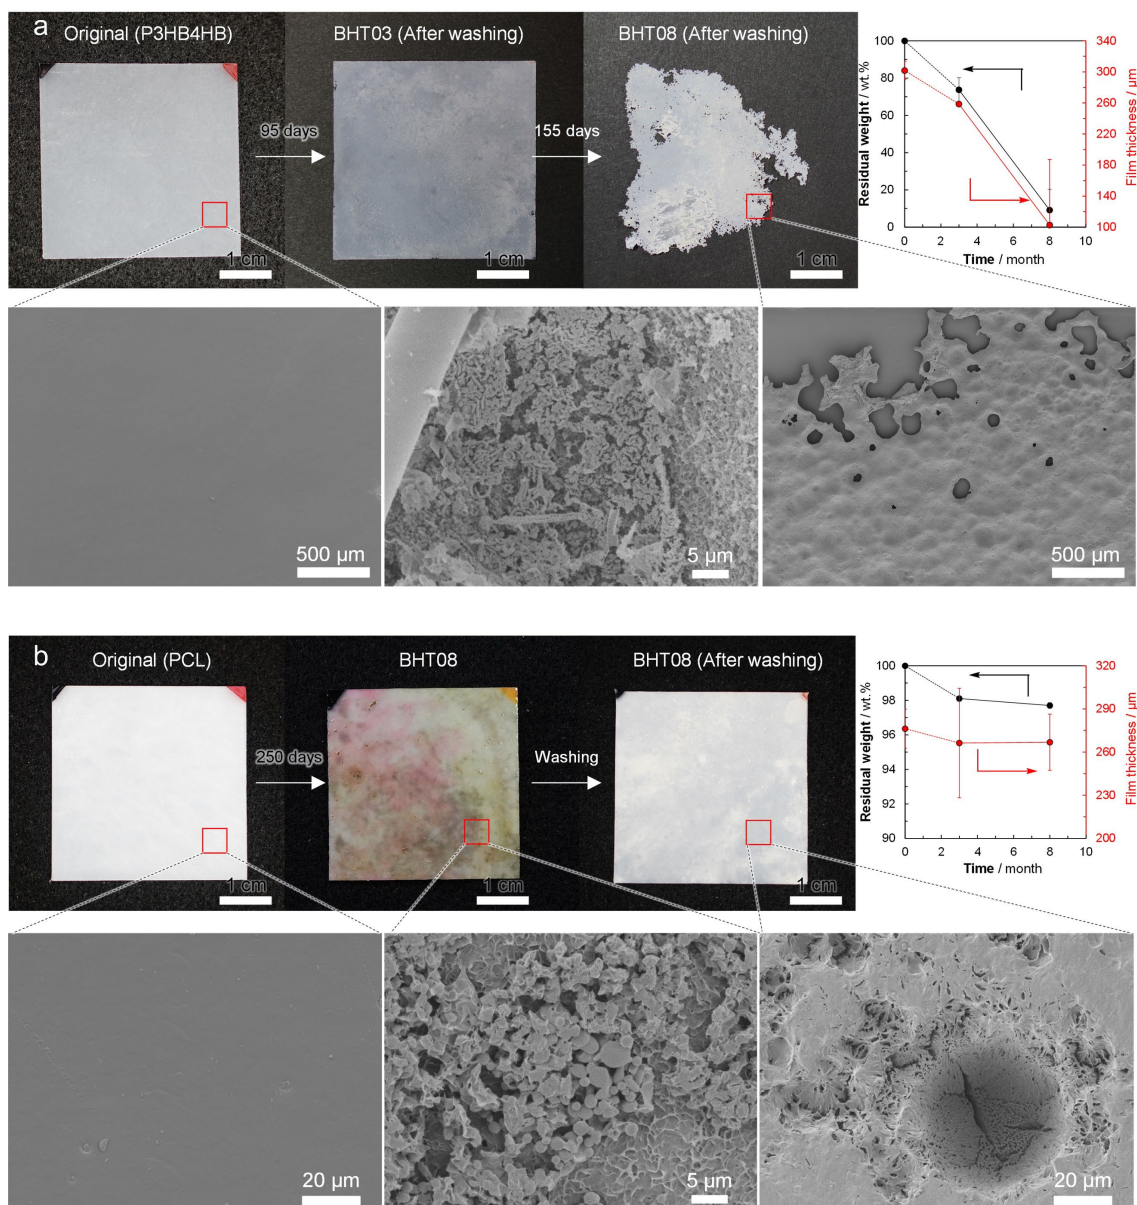

**Supplementary Fig. 6 | Photographs of film samples, graphs of weight loss and film thickness loss, and surface SEM images before and after decomposition for a, poly[(*R*)-3-hydroxybutyrate-co-16 mol%-4-hydroxybutyrate] (P3HB4HB) and b, poly( $\epsilon$ -caprolactone) (PCL).**

After 250 days of deployment at 855 m (the deep-sea floor) off Hatsushima Island (BHT08), the recovered films were ultrasonically washed to remove biofilm, vacuum dried, and then evaluated for weight loss (black line) and film thickness decrease (red line). Values are given as average of  $n = 4$  independent samples with its standard deviation (Supplementary Data 1). The scanning electron microscope (SEM) images show a magnified view of the surface of each film. While the surface of the original sample was smooth, microorganisms accumulated on the surface of the BHT08 sample, and the surface of the film after the microorganisms were removed by ultrasonic washing (BHT08 After washing) showed roughness typically observed following microbial degradation. The micrographs are representative images from  $n = 3$  independent samples with similar results. Source data are provided as a Source Data file.

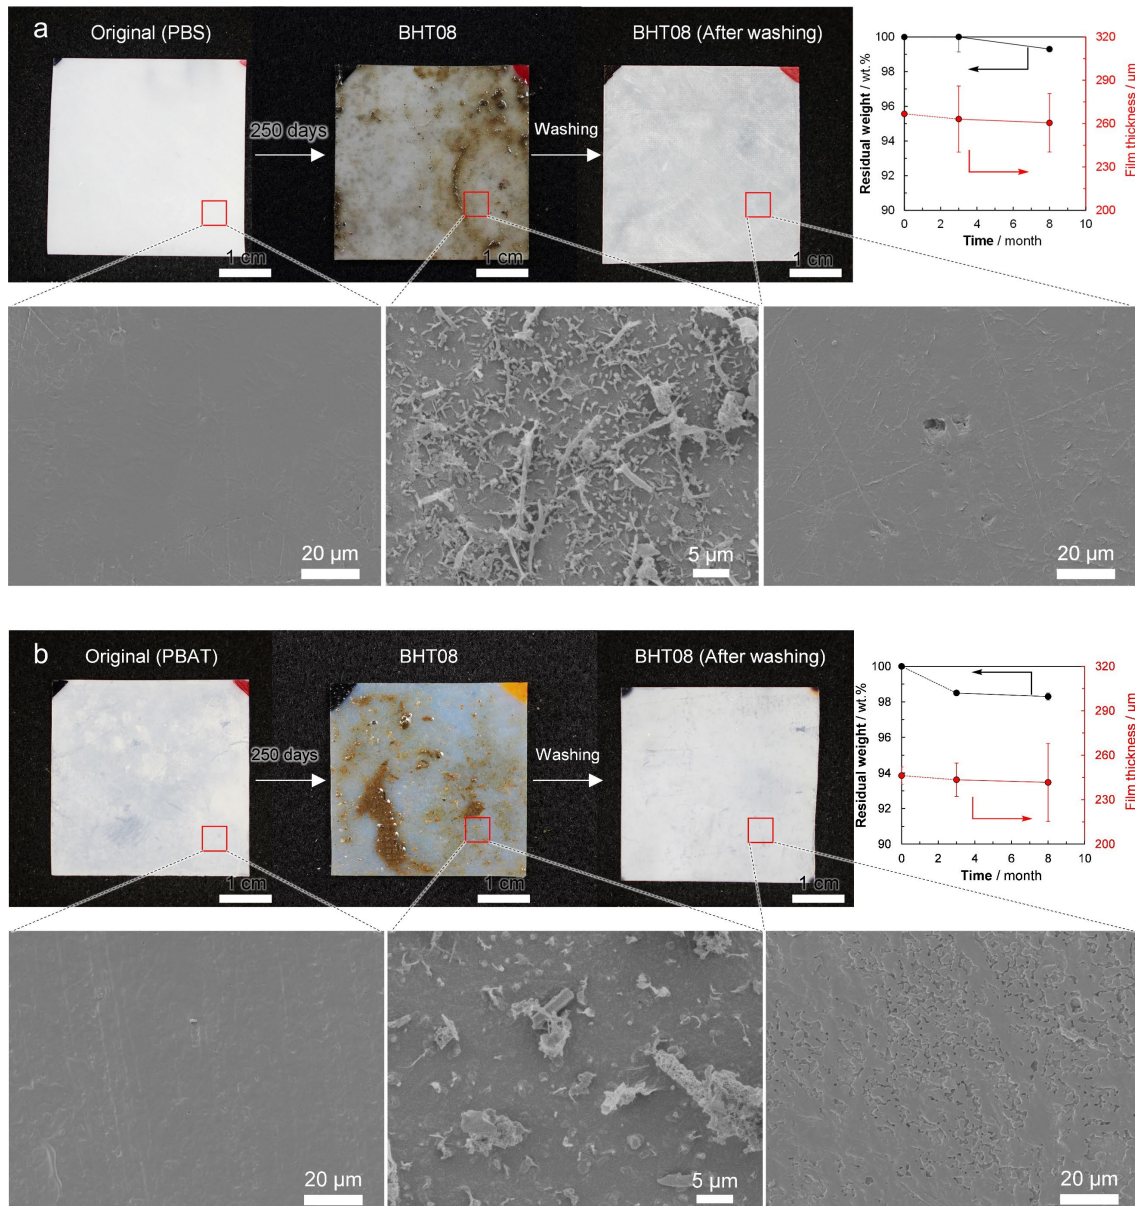

**Supplementary Fig. 7 | Photographs of film samples, graphs of weight loss and film thickness loss, and surface SEM images before and after decomposition for a, poly(butylene succinate) (PBS) and b, poly(butylene adipate-co-terephthalate) (PBAT).**

After 250 days of deployment at 855 m (the deep-sea floor) off Hatsushima Island (BHT08), the recovered films were ultrasonically washed to remove biofilm, vacuum dried, and then evaluated for weight loss (black line) and film thickness decrease (red line). Values are given as average of  $n = 4$  independent samples with its standard deviation (Supplementary Data 1). The scanning electron microscope (SEM) images show a magnified view of the surface of each film. While the surface of the original sample was smooth, microorganisms accumulated on the surface of the BHT08 sample, and the surface of the film after the microorganisms were removed by ultrasonic washing (BHT08 After washing) showed roughness typically observed following microbial degradation. The micrographs are representative images from  $n = 3$  independent samples with similar results. Source data are provided as a Source Data file.

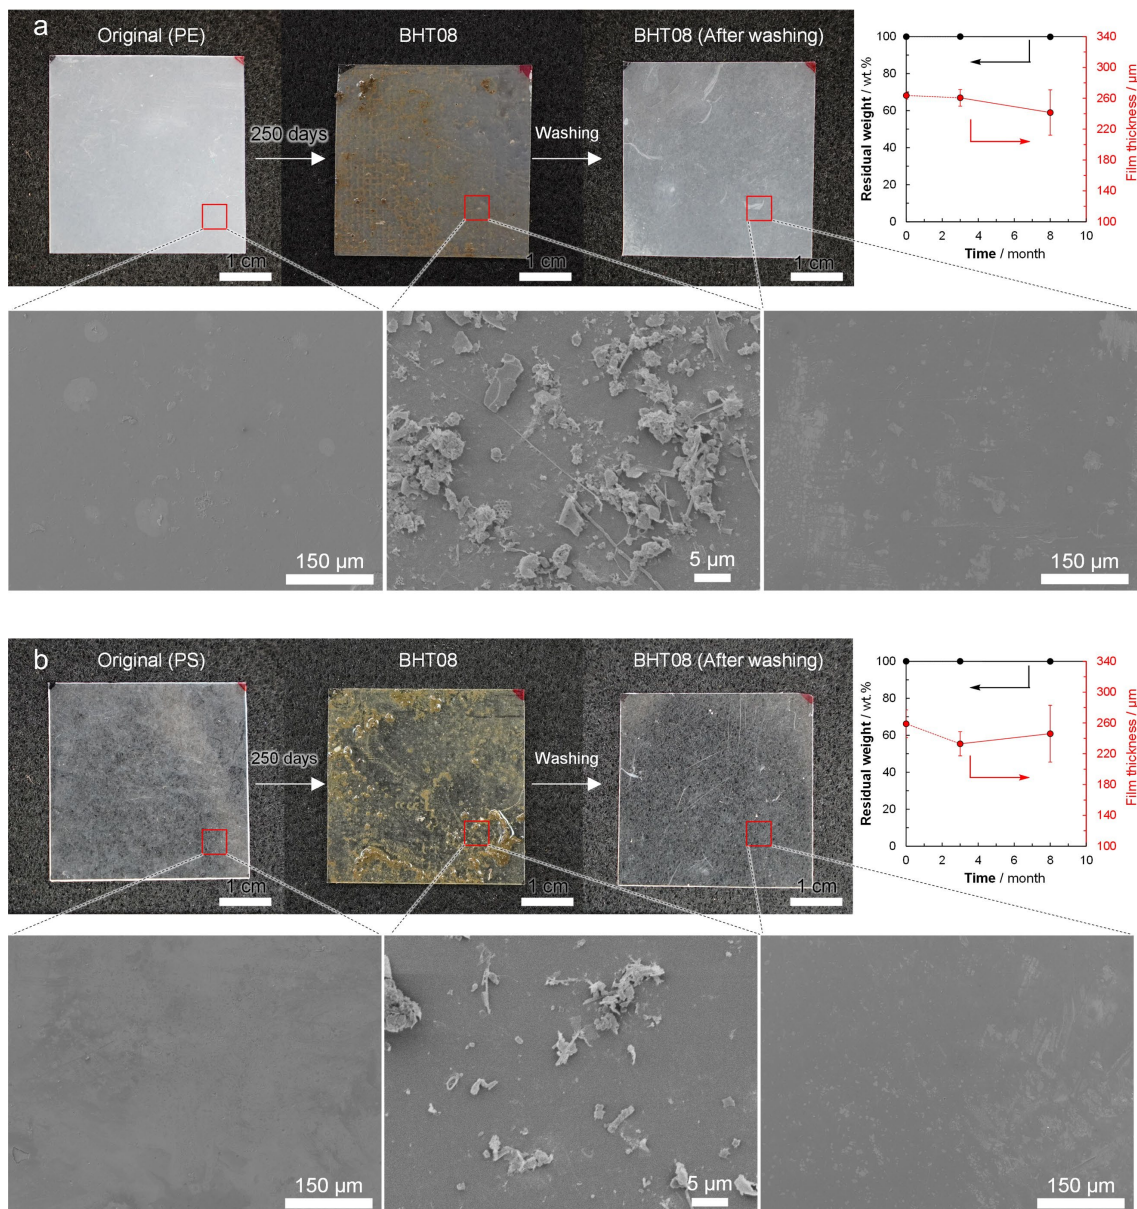

**Supplementary Fig. 8 | Photographs of film samples, graphs of weight loss and film thickness loss, and surface SEM images before and after decomposition for a, low-density Polyethylene (PE) and b, polystyrene (PS).**

After 250 days of deployment at 855 m (the deep-sea floor) off Hatsushima Island (BHT08), the recovered films were ultrasonically washed to remove biofilm, vacuum dried, and then evaluated for weight loss (black line) and film thickness decrease (red line). Values are given as average of  $n = 2$  independent samples with its standard deviation (Supplementary Data 1). The scanning electron microscope (SEM) images show a magnified view of the surface of each film. The original surface of the common plastic was smooth like the biodegradable plastic; little adhesion was observed on BHT08; and even after the surface adhesion was removed by ultrasonic washing (BHT08 After washing), a smooth surface was observed, as for the original films. The micrographs are representative images from  $n = 3$  independent samples with similar results. Source data are provided as a Source Data file.

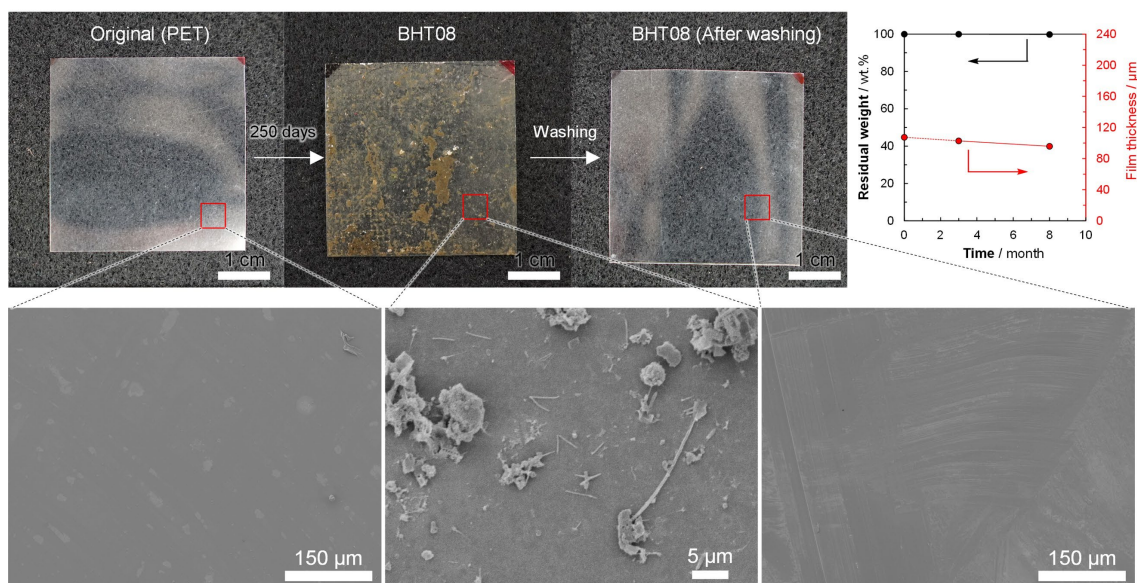

**Supplementary Fig. 9 | Photographs of film samples, graphs of weight loss and film thickness loss, and surface SEM images before and after decomposition for polyethylene terephthalate (PET).**

After 250 days of deployment at 855 m (the deep-sea floor) off Hatsushima Island (BHT08), the recovered films were ultrasonically washed to remove biofilm, vacuum dried, and then evaluated for weight loss (black line) and film thickness decrease (red line). Values are given as average of  $n = 2$  independent samples with its standard deviation (Supplementary Data 1). The scanning electron microscope (SEM) images show a magnified view of the surface of the film. The original surface was smooth like the biodegradable plastic; little adhesion was observed on BHT08; and even after the surface adhesion was removed by ultrasonic washing (BHT08 After washing), a smooth surface was observed, as for the original film. The micrographs are representative images from  $n = 3$  independent samples with similar results. Source data are provided as a Source Data file.

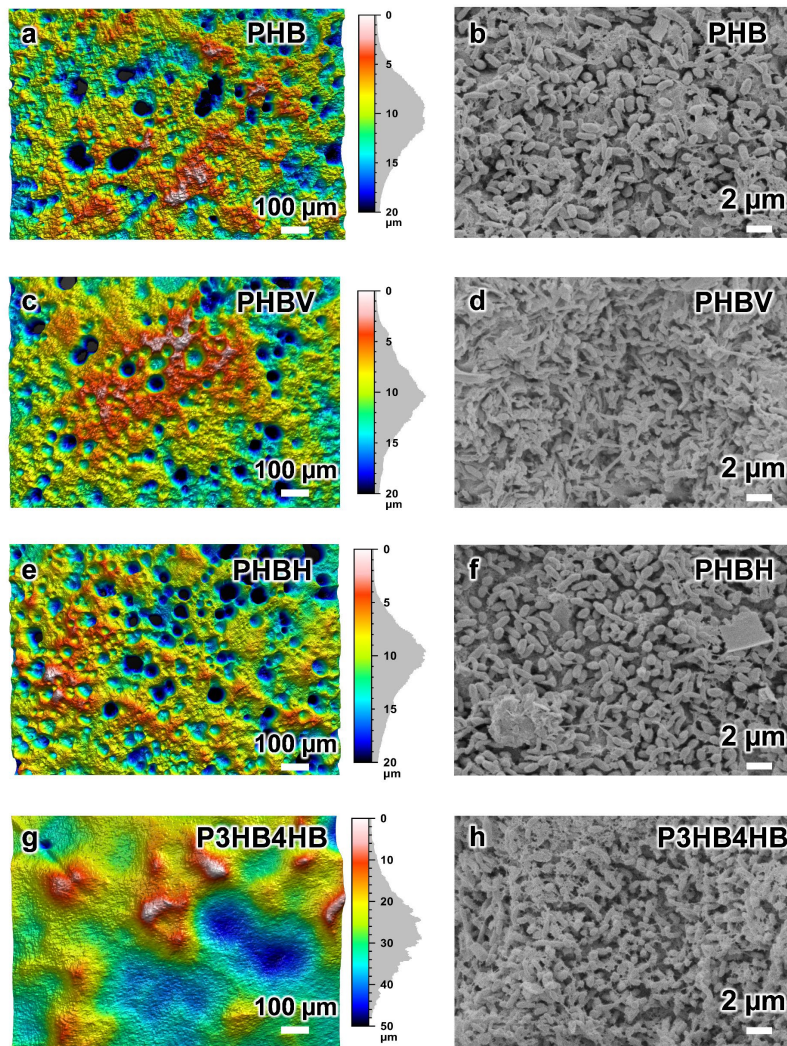

**Supplementary Fig. 10 | SEM images of four PHA films placed on the BHT site for three months. Color 3D maps of surface roughness and attached micro-organism images are shown in pairs.**

In the 3D maps of **a**, PHB, **c**, PHBV, and **e**, PHBH, numerous circular erosions with a diameter of 10-100  $\mu\text{m}$ , with an average depth of 10  $\mu\text{m}$  were observed. In the higher magnified images, numerous bacterial growths were observed in the erosion area **b**, **d**, **f** and **h**. These results strongly suggest that the erosions of the sample surface were caused by bacterial enzymatic biodegradation. The P3HB4HB was observed that the fastest weight loss ratio in deep sea. In the SEM observation, surface erosion of **g**, P3HB4HB films were progressed further than other PHA films. Large hole with several hundred  $\mu\text{m}$  diameter were observed where multiple holes were fused together, and the average depth of erosion was 30  $\mu\text{m}$  (Note that the color scale of **g**, is shown at 50  $\mu\text{m}$ ). The micrographs are representative images from  $n = 3$  independent samples with similar results. Source data are provided as a Source Data file.

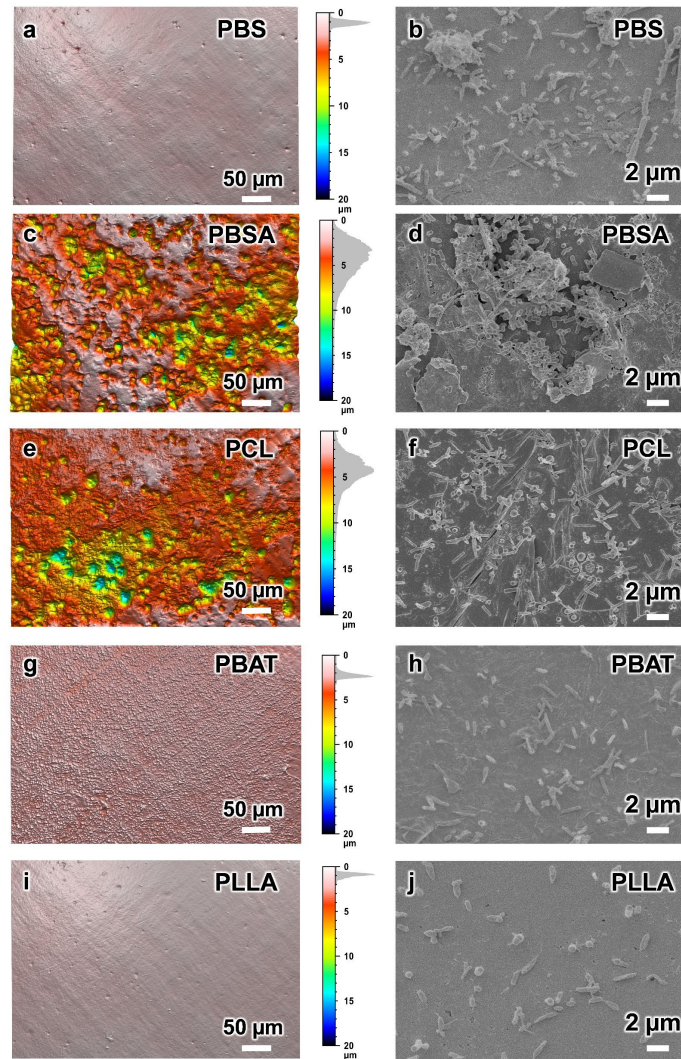

**Supplementary Fig. 11 | SEM images of five types of biodegradable polyesters films placed on the BHT site for three months. Surface roughness images by color 3D mapping and microstructures of attached bacteria are shown in pairs (Note that the 3D map magnification was larger than that of the PHA films because of their slow biodegradation).**

In observation of the biodegradable polyesters **a, b** PBS, **c, d** PBSA, **e, f** PCL, **g, h** PBAT and **i, j** PLLA, significant surface erosion was observed in **c** PBSA and **e** PCL, with showing circular erosions up to 50  $\mu\text{m}$  in diameter and an average depth of 5  $\mu\text{m}$ , respectively. Bacterial growth was observed in the magnified images **d, f**. In the **g** PBAT film showed fine erosion, suggesting that early stage of degradation. On the other hand, no surface erosion was observed in **a**, PBS and **i** PLLA, however, the amount of attached bacteria was clearly higher on the surface of PBS film than that of **i** PLLA. It suggests that the bacterial growth was still early stage. The micrographs are representative images from  $n = 3$  independent samples with similar results. Source data are provided as a Source Data file.

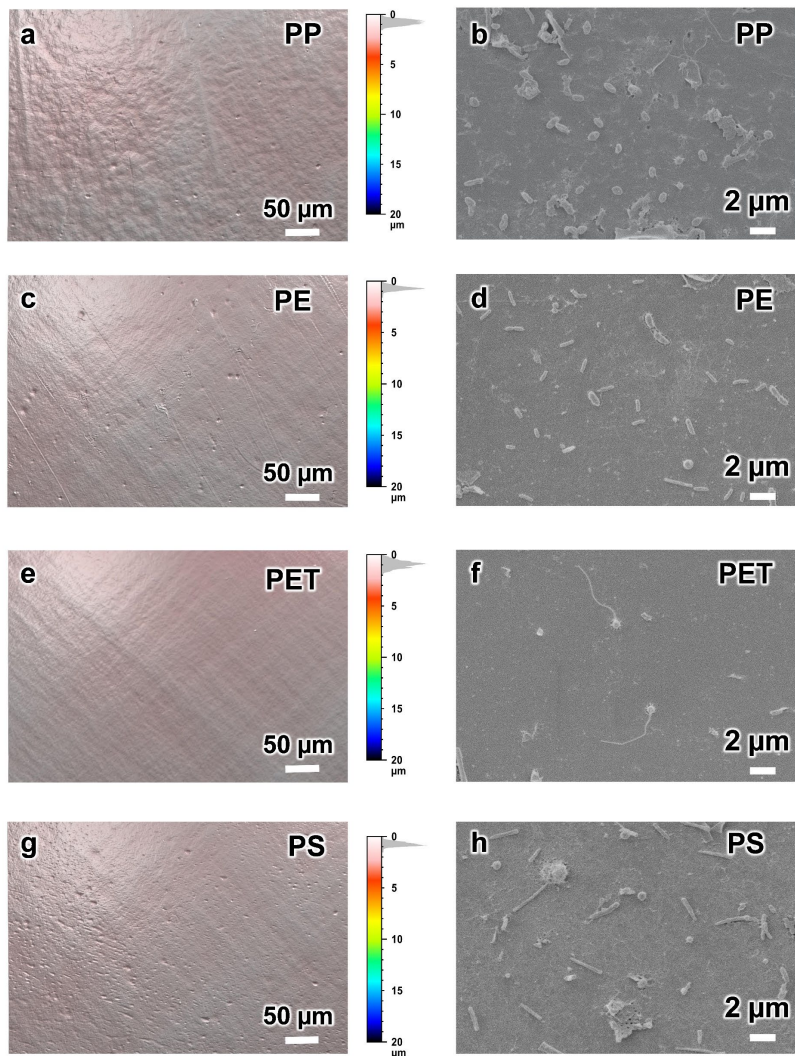

**Supplementary Fig. 12 | SEM images of four types of common plastic films placed on the BHT site for three months. Surface roughness images by color 3D mapping and microstructures of attached bacteria are shown in pairs (Note that the 3D map magnification was larger than that of the PHA films because of their slow biodegradation).**

No surface erosion was observed in any common plastics, and although bacteria were observed adhering on the surface, no signs of specific bacterial growth were observed **a-h**. The micrographs are representative images from  $n = 3$  independent samples with similar results. Source data are provided as a Source Data file.



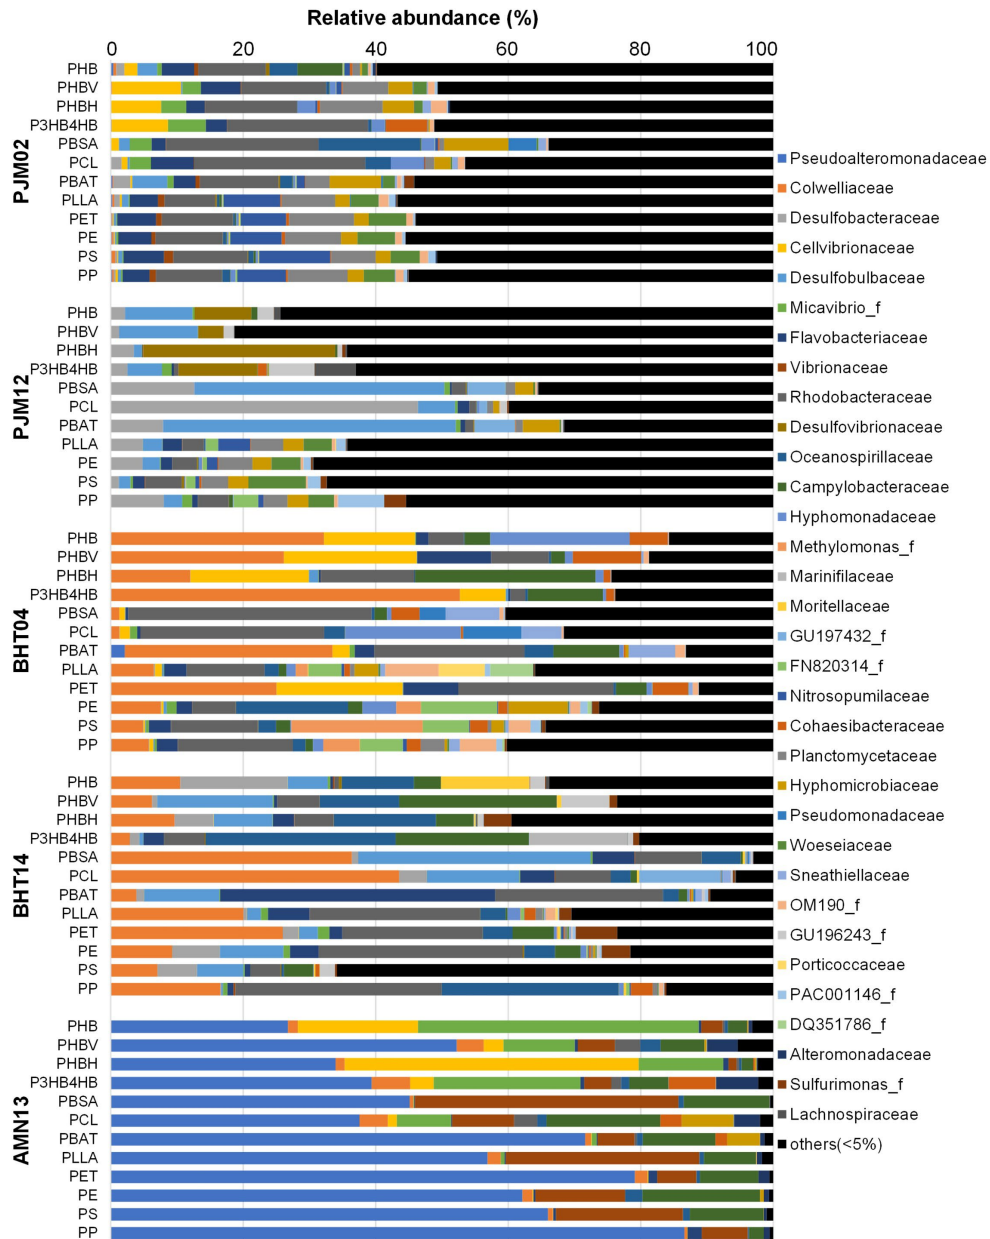

**Supplementary Fig. 13 | 16S rRNA gene-based prokaryotic community composition of biofilms from PHA, biodegradable polyesters, and non-biodegradable common plastics, at the family-level.**

“Others” are families representing <5% relative abundance.

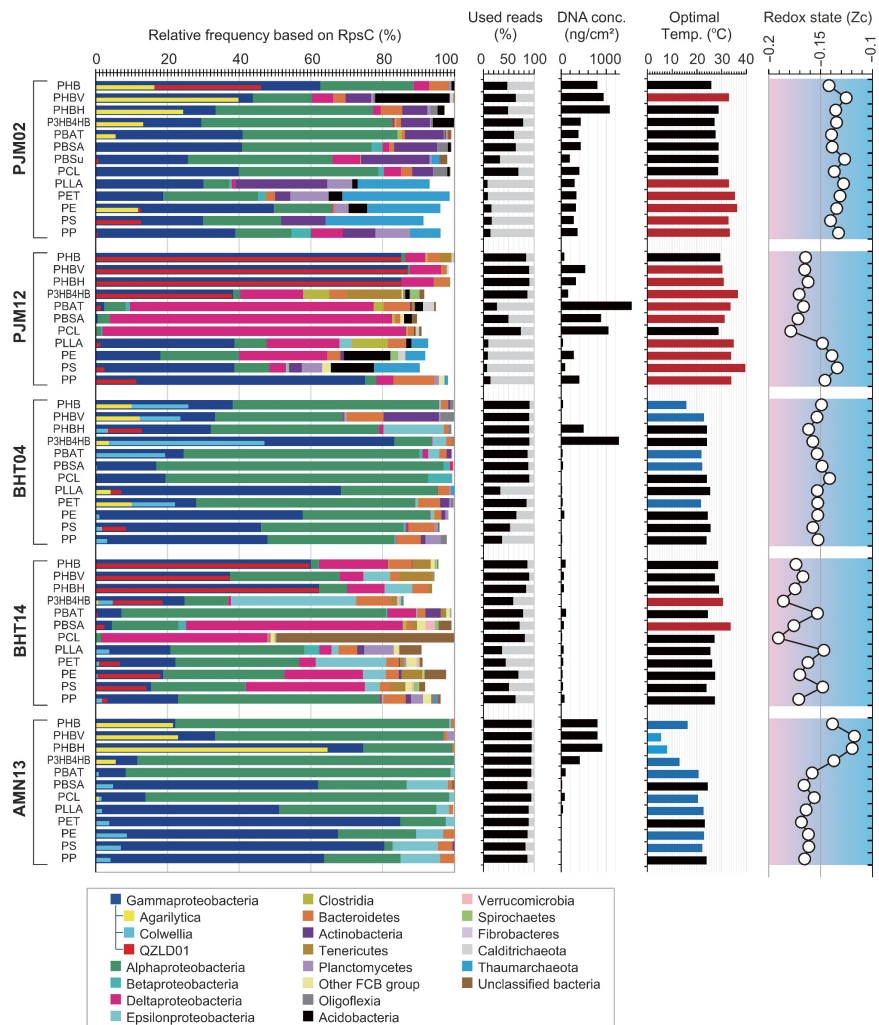

**Supplementary Fig. 14 | Metagenome-based microbial community compositions of plastisphere established on various plastics at the sea.**

Colored bar chart shows comparison of microbial community compositions based on Phylum or Class taxa of RpsC gene from the metagenomic analysis. As for *Gammaproteobacteria*, three main lower-level taxa are shown in lower bar. Usage of metagenomic raw reads for the *de novo* assembly was calculated after mapping them to the scaffolds, while DNA concentration per plastic surface area was determined after extracting DNA.

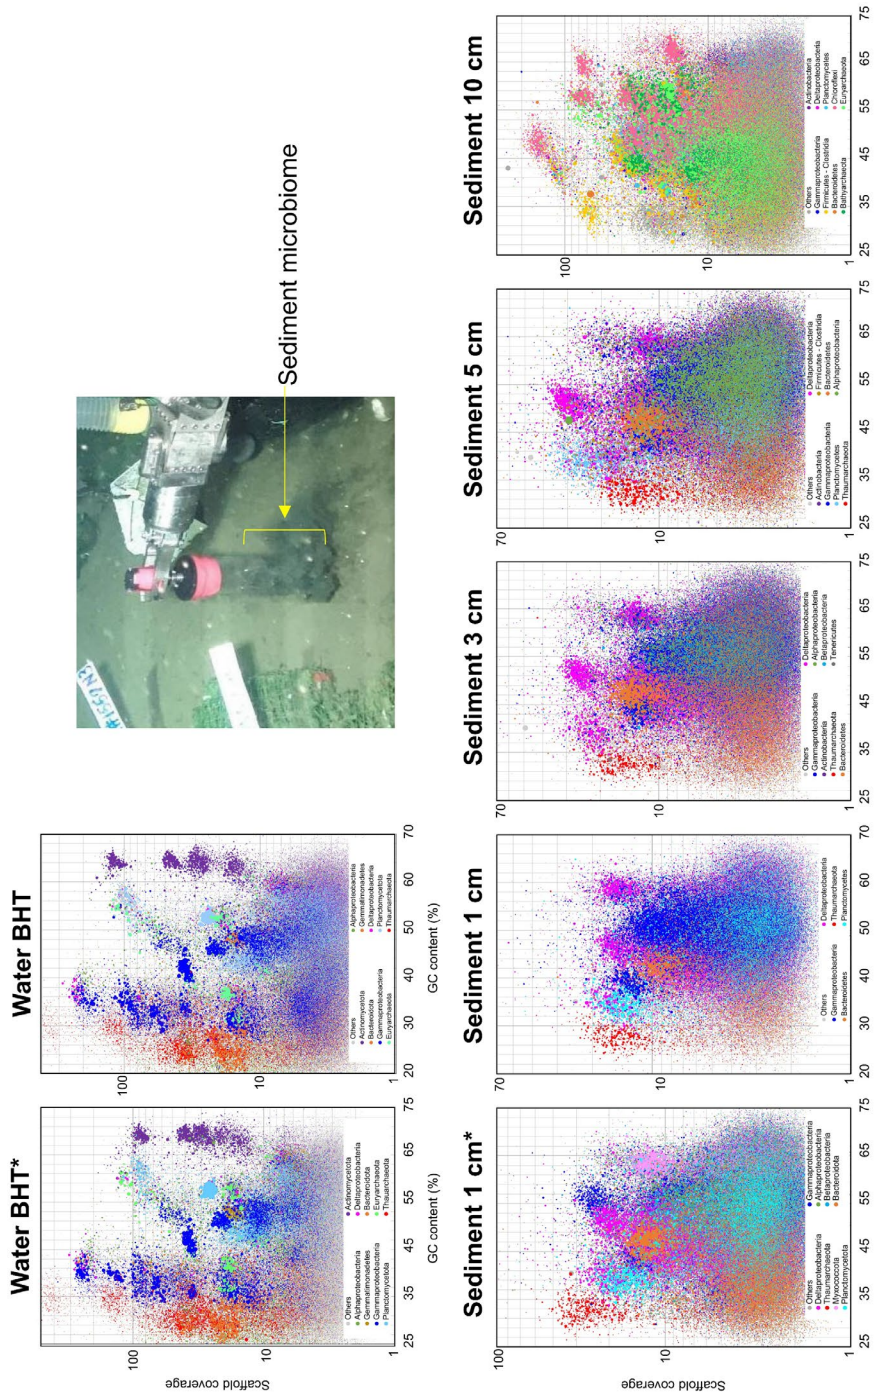

**Supplementary Fig. 15 | Metagenomic assembly of deep-seawater and sediment microbiome near plastic degradation test at site BHT.**

Genome clusters from the assembled scaffolds from metagenomic sequences were identified using the estimated taxonomic classification (color of dots), length (size of dots), G+C content (x-axis), and mean coverage of scaffold (y-axis). \* indicates microbiome near plastic-containing chambers.

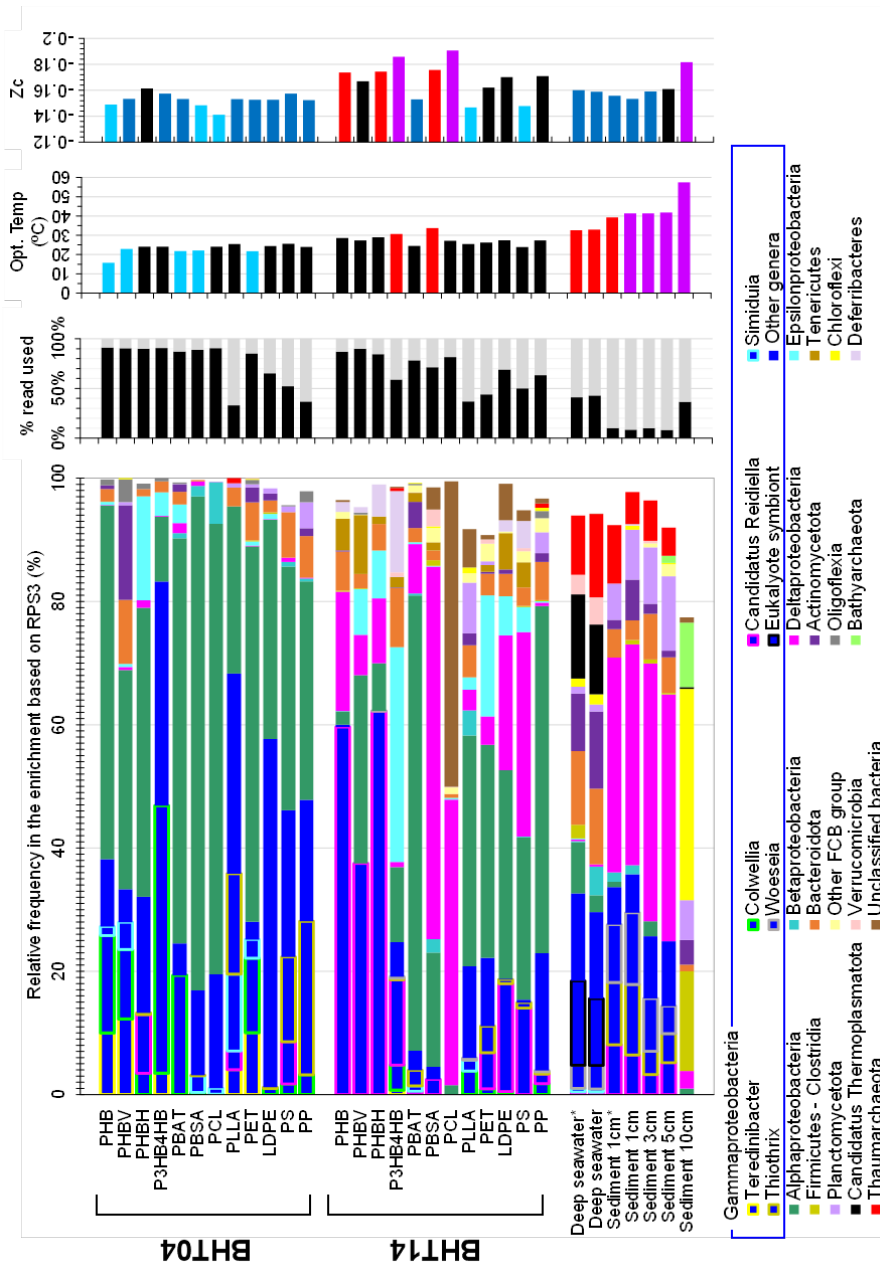

**Supplementary Fig. 16 | Metagenome-based microbial community compositions of plastisphere compared with surrounding deep seawater and sediment under the plastic chamber at site BHT.**

The bar chart shows comparison of microbial community compositions (phylum or class) based on RpsC gene sequences from the metagenomic analysis. For *Gammaproteobacteria* (blue bar), seven main genera are highlighted by different colors. Use of metagenomic raw reads for the *de novo* assembly, estimated optimal growth temperature of the taxon, and estimated redox state ( $Z_c$ ) are shown as bar charts.

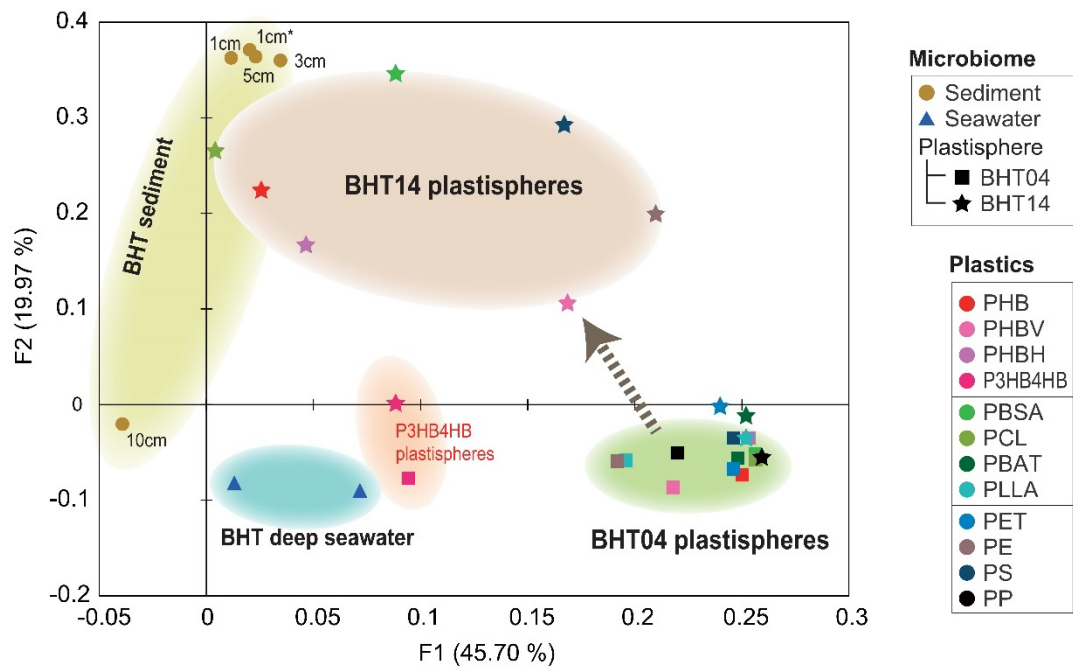

**Supplementary Fig. 17 | Comparison of microbial community compositions among plastispheres, the deep-sea microbiome, and sediments at site BHT.**

Principal component analysis was performed based on phylum-level microbial community composition as described in Supplementary Fig. 16 for the class *Gammaproteobacteria*.

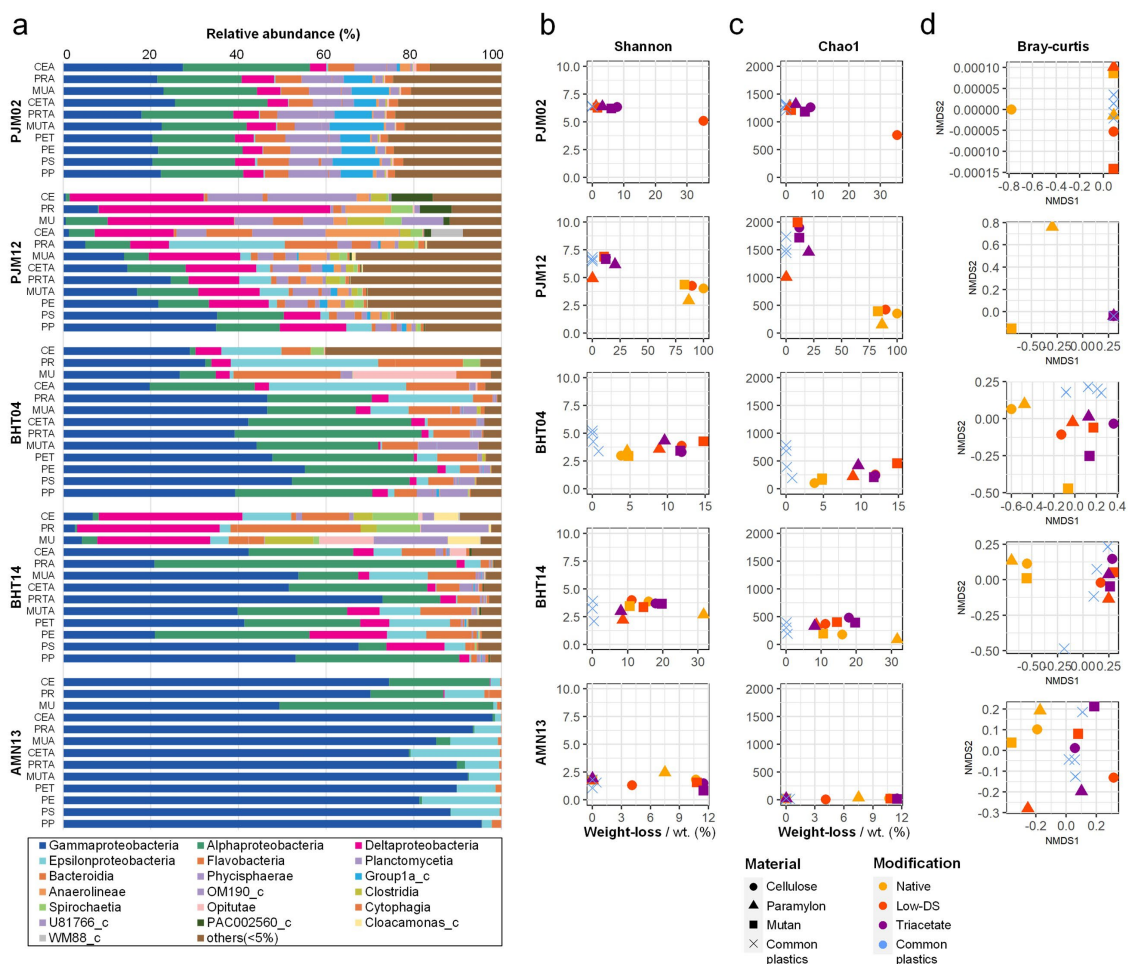

**Supplementary Fig. 18 | Polysaccharide-associated bacterial communities vary by degree of acetylation, site, and immersion period.**

The data for three native samples at PJM02 could not be obtained because of sample degradation. **a**, 16S rRNA gene-based community compositions at the class level in biofilms on polysaccharides. “Others” are classes representing <5% relative abundance. **b** and **c**, Correlation between material degradation and diversity of prokaryotic communities of each material shown in terms of the Shannon index **b** and Chao1 index **c**. **d**, Non-metric multidimensional scaling (NMDS) ordination of bacterial community composition between polysaccharides and common plastics using Bray–Curtis dissimilarity. NMDS stress value: 0.000084 (PJM02), 0.000085 (PJM12), 0.1099 (BHT04), 0.064523 (BHT14), and 0.113100 (AMN13). These plots show similarity between the communities on acetylated polysaccharides and those on common plastics.

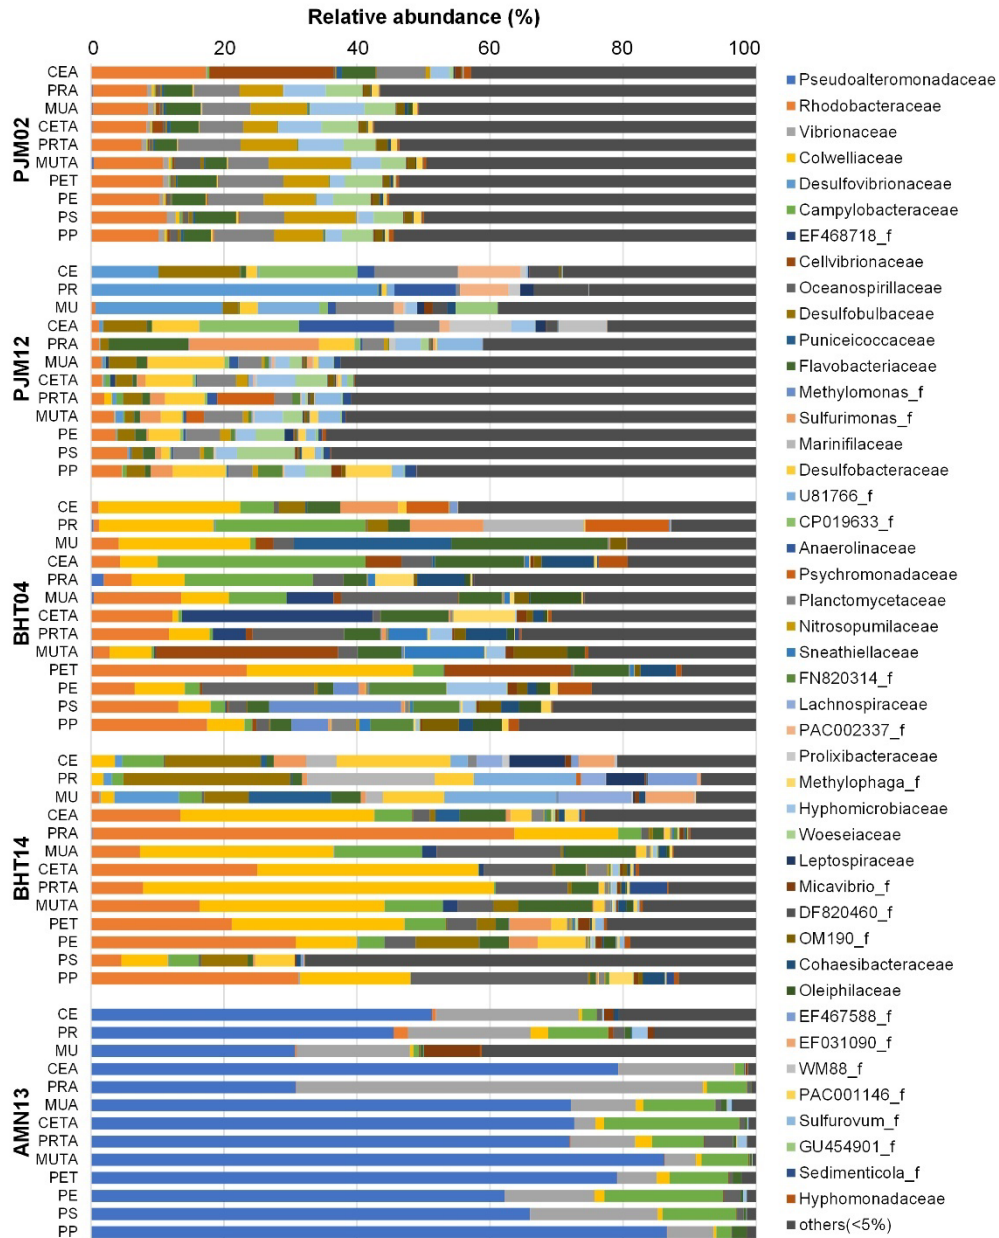

**Supplementary Fig. 19 | 16S rRNA gene-based prokaryotic community composition of polysaccharides, polysaccharide ester derivatives and common plastics at the family level.**

“Others” are families representing <5% relative abundance; the data for three native samples at PJM02 could not be obtained because of sample degradation.

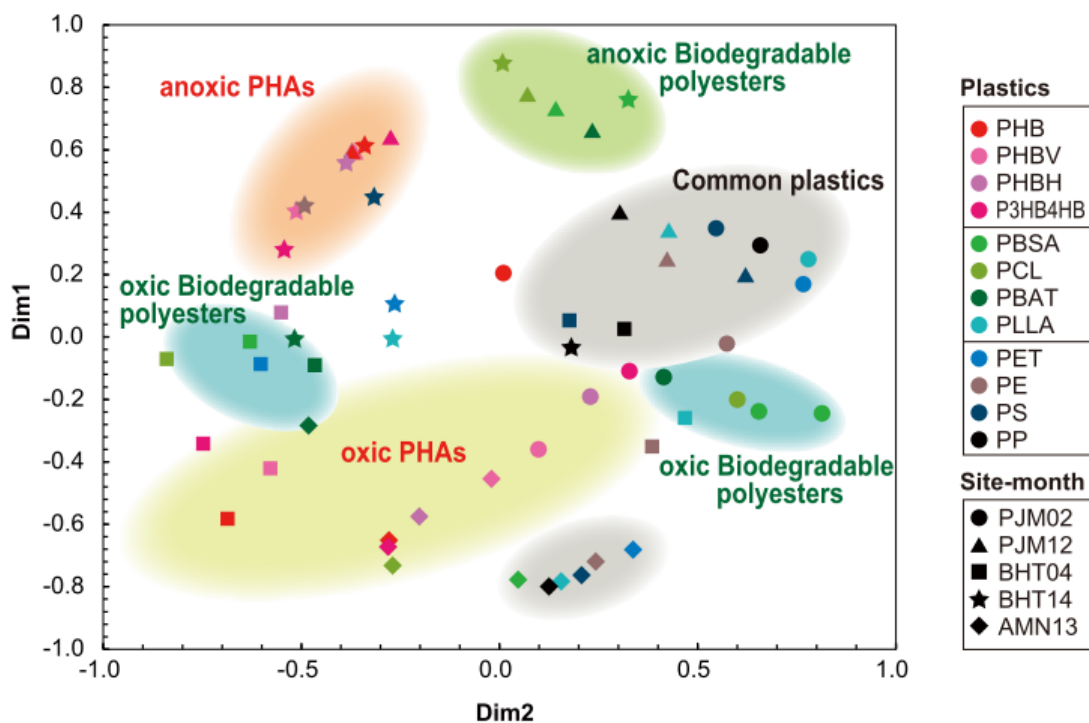

**Supplementary Fig. 20 | Comparison of microbial community compositions of the plastispheres based on a multidimensional scale plot.**

Multidimensional scale (MDS) plot is analyzed based on microbial community composition described in Supplementary Fig. 14 with sub-division of *Gammaproteobacteria*, *Alphaproteobacteria*, and *Deltaproteobacteria*.



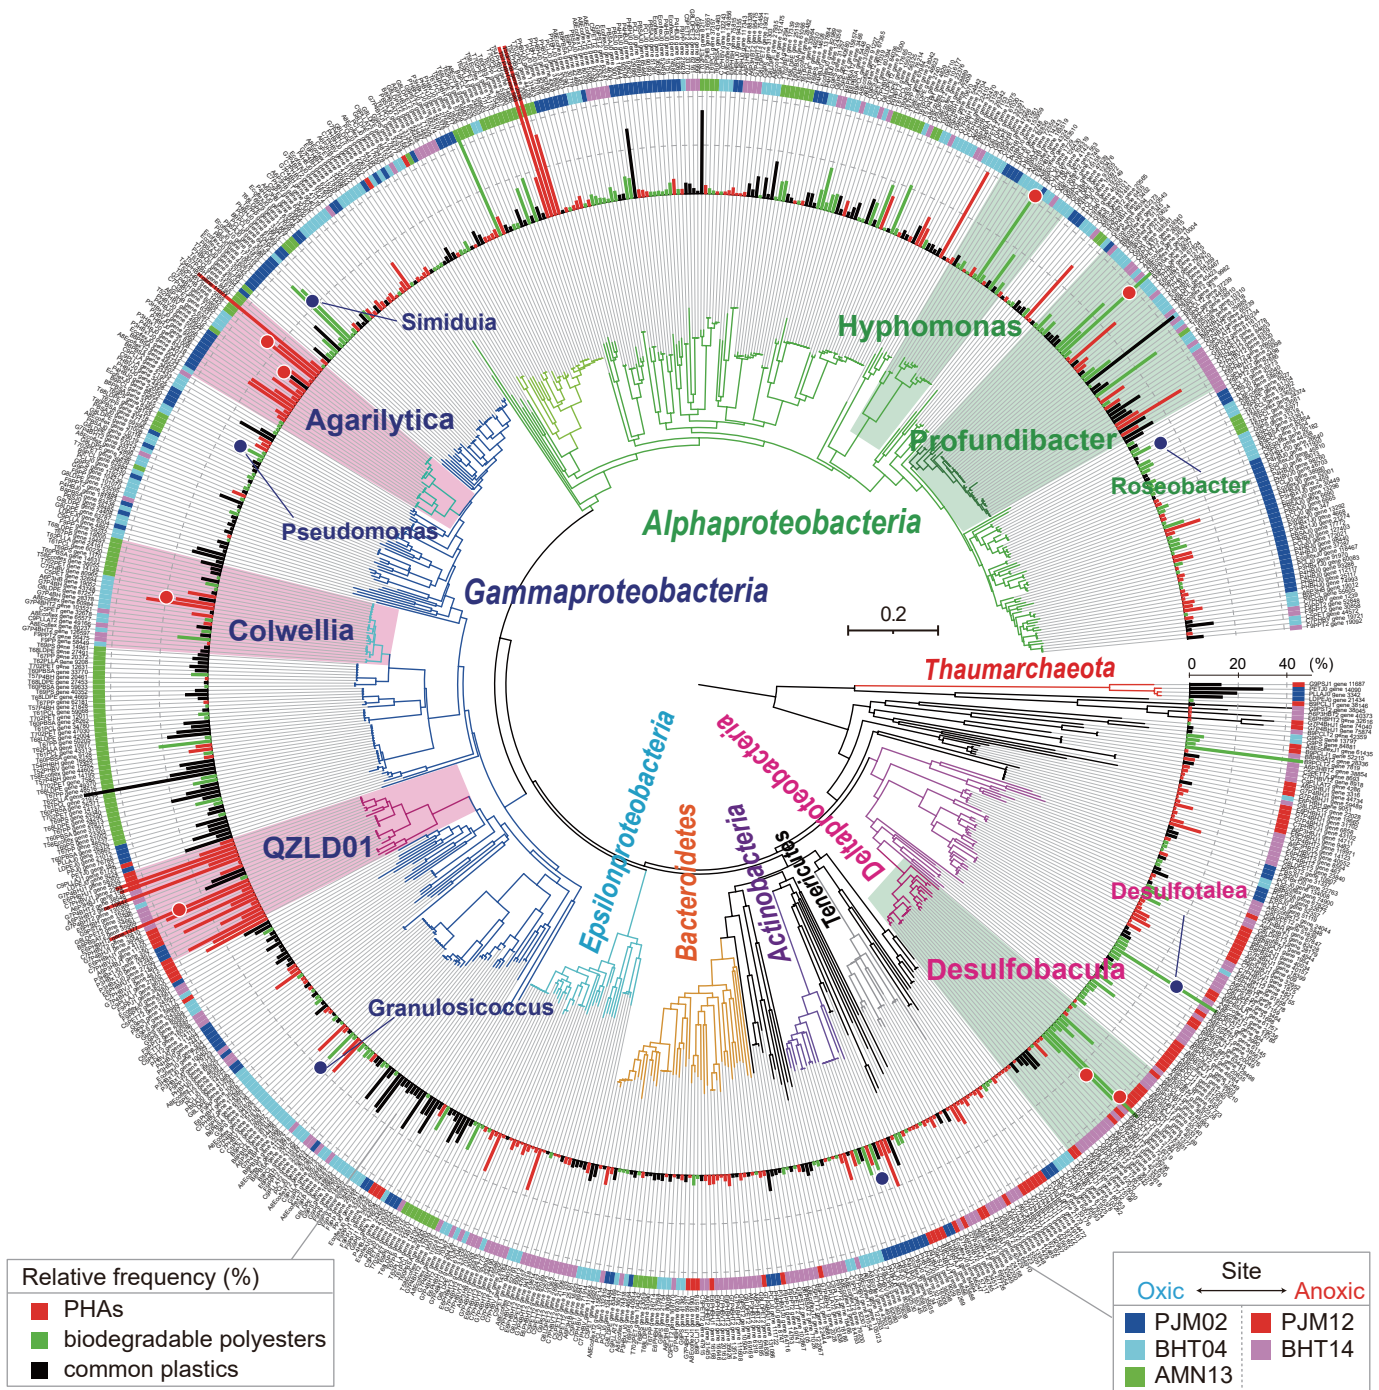

**Supplementary Fig. 21 | Phylogenetic tree of single-copy housekeeping gene, ribosomal protein S3, RpsC, identified in plastisphere metagenomes at the sea.**

Phylogenetic tree of ribosomal protein S3 (RpsC) identified in all metagenomic assemblies is shown. Taxonomy of the proteins is shown by different color of nodes. Relative frequency within the communities is shown by bar chart outside the tree with different colors (red, PHAs; green, biodegradable polyesters; black, common plastics). The site and immersion time are shown as color strip outside of the bar chart. Dominant MAGs used for subsequent analysis are marked by a red dot, while their taxonomies are also described. Another six MAGs show in biodegradable polyesters are marked by a blue dot. Gene ID coding the RpsC protein is described outside of the color strip.

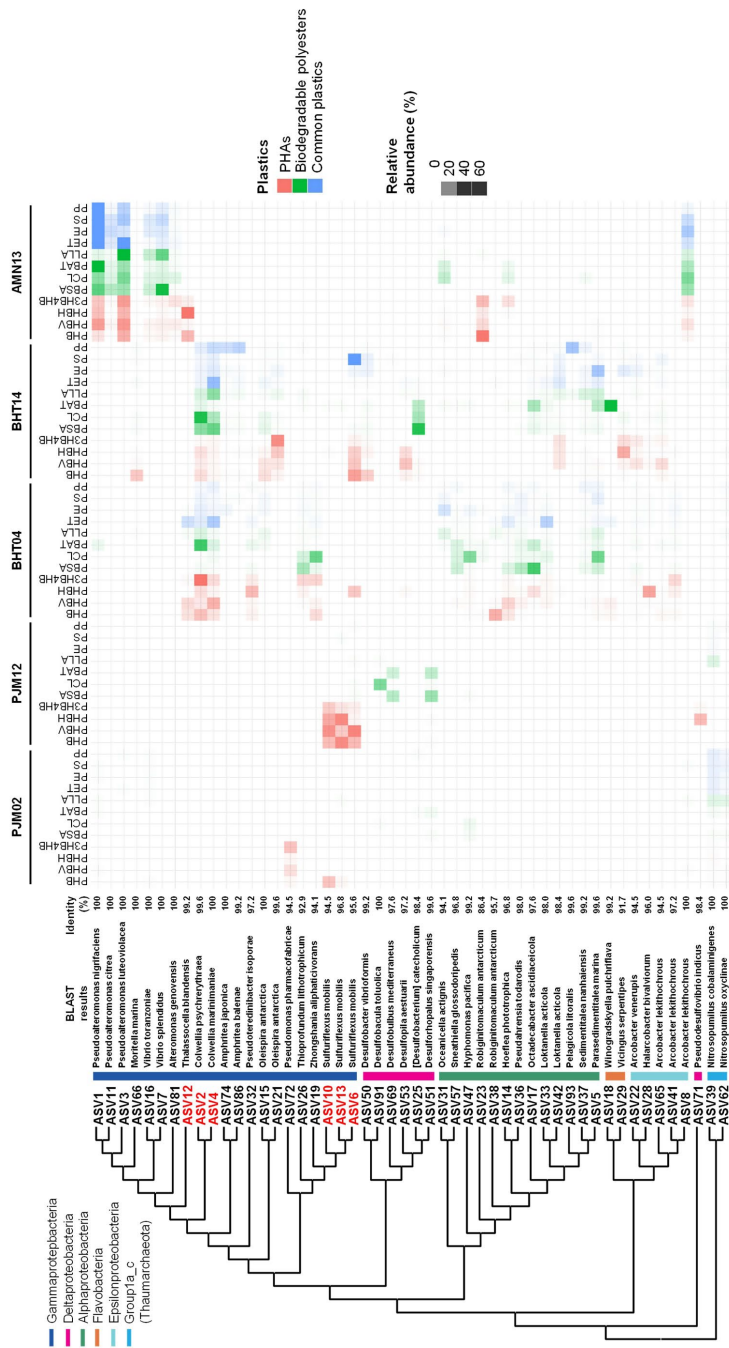

**Supplementary Fig. 22 | Shade plot illustrating the relative abundances (%) of plastic-specific amplicon sequence variants (ASVs) at different sites and periods of immersion.**

The top 50 most abundant ASVs (assigned by specific numbers) across the gross relative abundance in all plastispheres on 12 plastics in five samples at three marine sites are indicated. Relative abundances of ASVs among different plastics, sites, and periods of immersion are displayed by shading of cells—darker represents higher abundance. Blocks are colored to indicate the classification of plastics: polyhydroxyalkanoate (PHA) plastics marked as red include PHB, PHBV, PHBH, and P3HB4HB; biodegradable polyesters marked as green include PLLA, PBSA, PCL, and PBAT; common plastics marked as blue include PE, PP, PS, and PET. The horizontal axis shows the type of plastic associated with the plastisphere in each sampling. On the vertical axis, a phylogenetic tree shows the top 50 ASVs. Classification at the class level is indicated by color. The closest taxonomic species identified by BLAST search and the identity (%) are also shown.

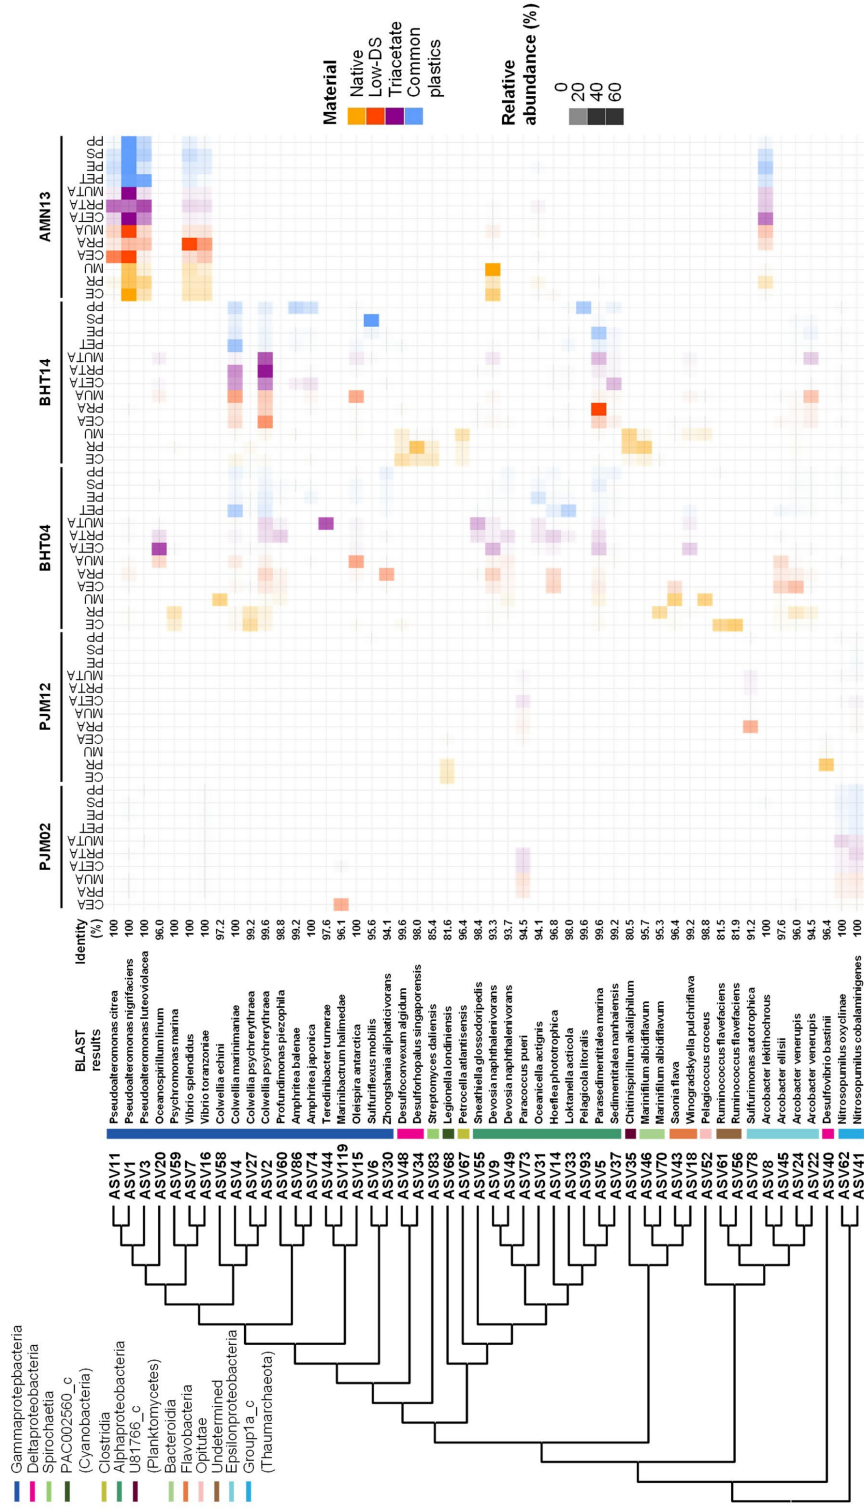

**Supplementary Fig. 23 | Shade plot of the 50 most abundant ASVs in biofilms obtained from all polysaccharides and non-biodegradable common plastics.**

A phylogenetic tree of ASVs was constructed using the neighbor-joining method. Color bars on the right-side of ASV numbers show the class to which the ASV belongs.

The heatmap shows the distribution of dominant ASVs (>10% total reads) in anaerobic enrichment cultures from Atlantis Massif seafloor rocks. The ASV name, its class affiliation, the name of its closest species, and 16S rRNA gene percentage identity with this closest homologue are indicated on the right.

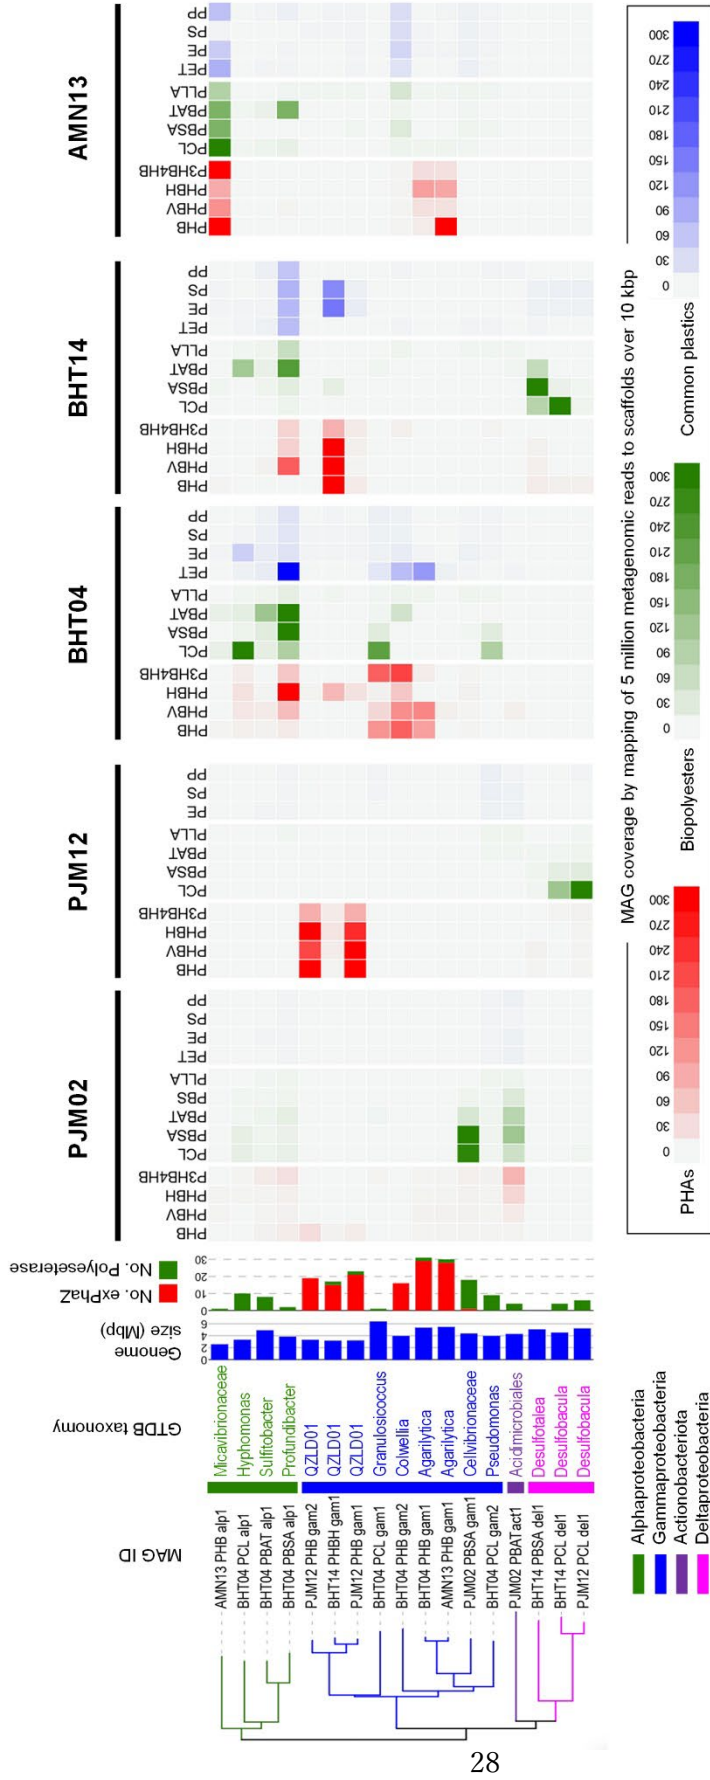

**Supplementary Fig. 24 | Shade plot illustrating the relative abundances of plastic specific metagenome-assembled genomes (MAGs) at different sites and periods of immersion.**

The 17 highly abundant MAGs across the gross relative abundance of all plastispheres on twelve plastics in five sampling at three marine sites were indicated. Relative abundances of MAGs among different plastics, sites, and periods of immersion were displayed by shading of cells, darker represented higher abundance. Cells were colored to indicate the classification of plastics. Polyhydroxyalkanoate (PHA) plastics marked as red including PHB, PHBV, PHBH, and P3HB4HB; biopolyester plastics marked as green including PLLA, PBSA, PCL, and PBAT; common plastics marked as blue including PE, PP, PS, and PET. The horizontal axis showed types of plastics to obtain plastispheres in each sampling. The vertical axis showed a phylogenetic tree of the 17 MAGs along with GTDB taxonomy, genome size, and number of degrading enzymes (secreted PHB depolymerase, exPhaZ, and polyesterase) coded in the MAGs.

**a**

| Site_MAG ID     | PpsC-based taxonomy | Oxic/ Anoxic | OTU    | Relative frequency | Genome Size (bp) | No. Scaffolds | PHB depolymerases | Cutinases/ Polyesterases |
|-----------------|---------------------|--------------|--------|--------------------|------------------|---------------|-------------------|--------------------------|
| BHT04_PCL gam1  | Granulosicoccus     | Oxic         | ASV019 | 14.2%              | 6,319,541        | 642           | 0                 | 1                        |
| BHT04_PCL gam2  | Pseudomonas         | Oxic         | ASV095 | 6.8%               | 3,889,687        | 23            | 0                 | 9                        |
| PJM02_PBAT act1 | Actinobacteria      | Oxic         | ASV142 | 10.7%              | 4,238,728        | 296           | 0                 | 4                        |
| BHT04_PBAT alp2 | others (Alpha)      | Oxic         | ASV065 | 7.8%               | 4,833,856        | 61            | 0                 | 8                        |
| PJM02_PBSA gam1 | Simidiua            | Oxic         | ASV141 | 32.1%              | 4,307,390        | 14            | 1                 | 17                       |
| BHT14_PBSA del1 | Desulfotalea        | Anoxic       | ASV025 | 49.9%              | 4,989,220        | 165           | 0                 | 0                        |

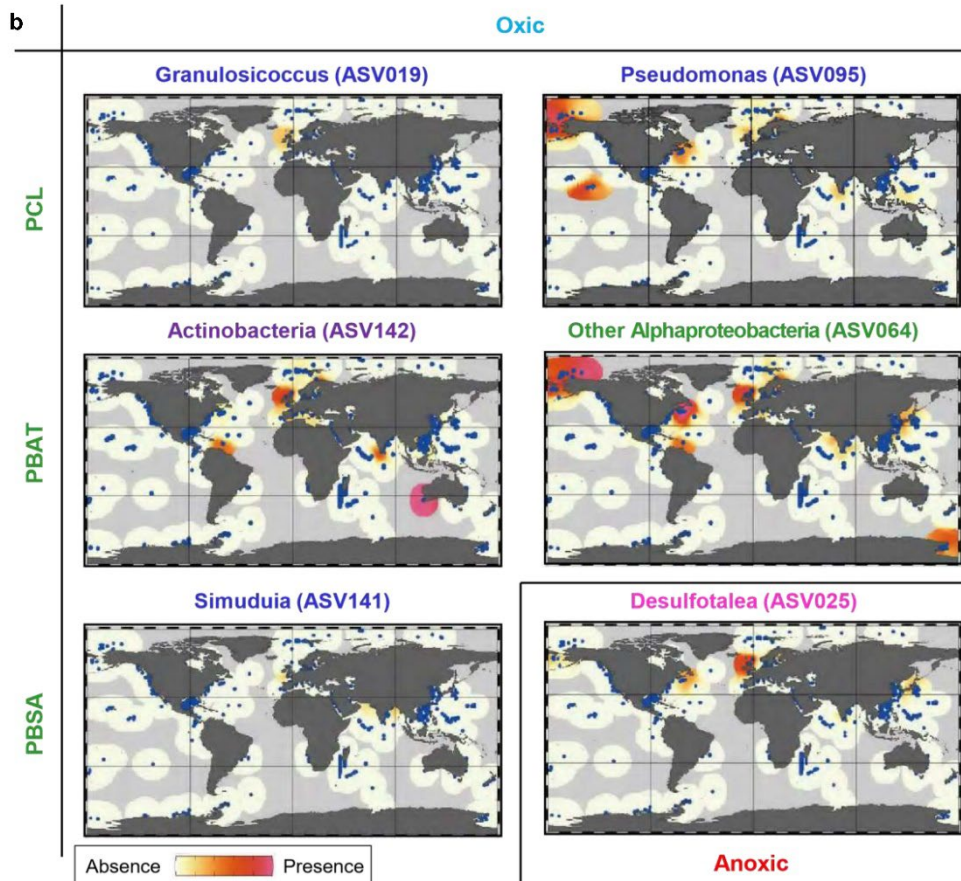

**Supplementary Fig. 25 | Additional information for MAGs of dominant microbes within plastisphere established on biodegradable polyesters at the sea.**

**a**, Stats of metagenome-assembled genomes (MAGs) abundantly observed within the plastispheres of biodegradable polyesters under oxic/anoxic conditions. Number of key genes related to biodegradation of the plastics are described for each MAG. **b**, The global distribution of the six potential degraders of biodegradable polyesters (PCL, PBAT, or PBSA) in the marine sediment. Full length 16S rRNA sequences from each MAG were used for the analysis with the reference of publicly available 16S rRNA surveys.

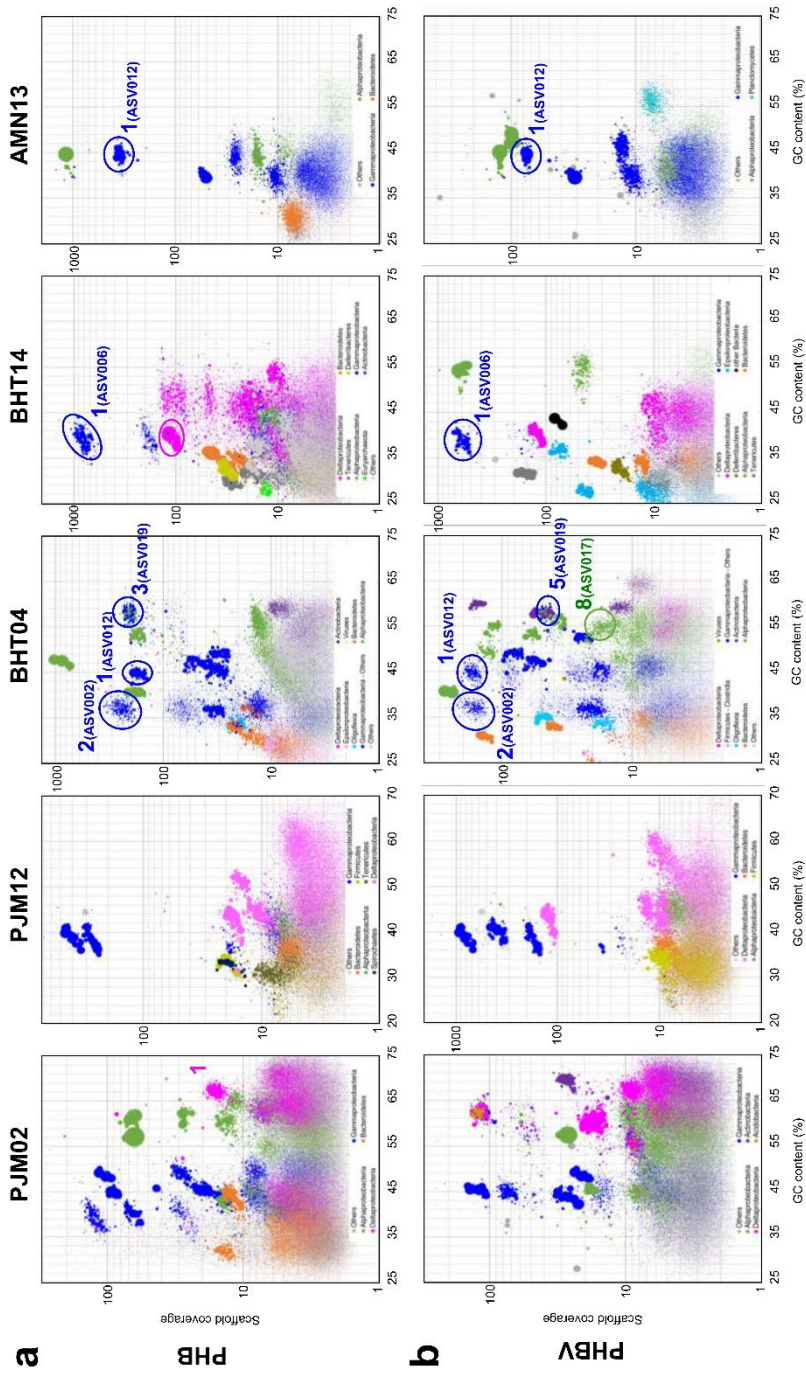

**Supplementary Fig. 26 | Genome clustering from metagenome sequences of plastisphere for a, PHB and b, PHBV established under oceanic condition.**

Genome clusters from the assembled scaffolds from metagenomic sequences of plastisphere under different oceanic location, water depth, and time were identified using the estimated taxonomic classification (color of dots), length (size of dots), GC content (X-axis) and mean coverage of scaffold (Y-axis). Colored circles on PHB plastispheres (panel a) indicate clusters of individual metagenome-assembled genomes (MAGs), while numbers shown near the circles correspond to the MAG IDs established from plastisphere PHBs.

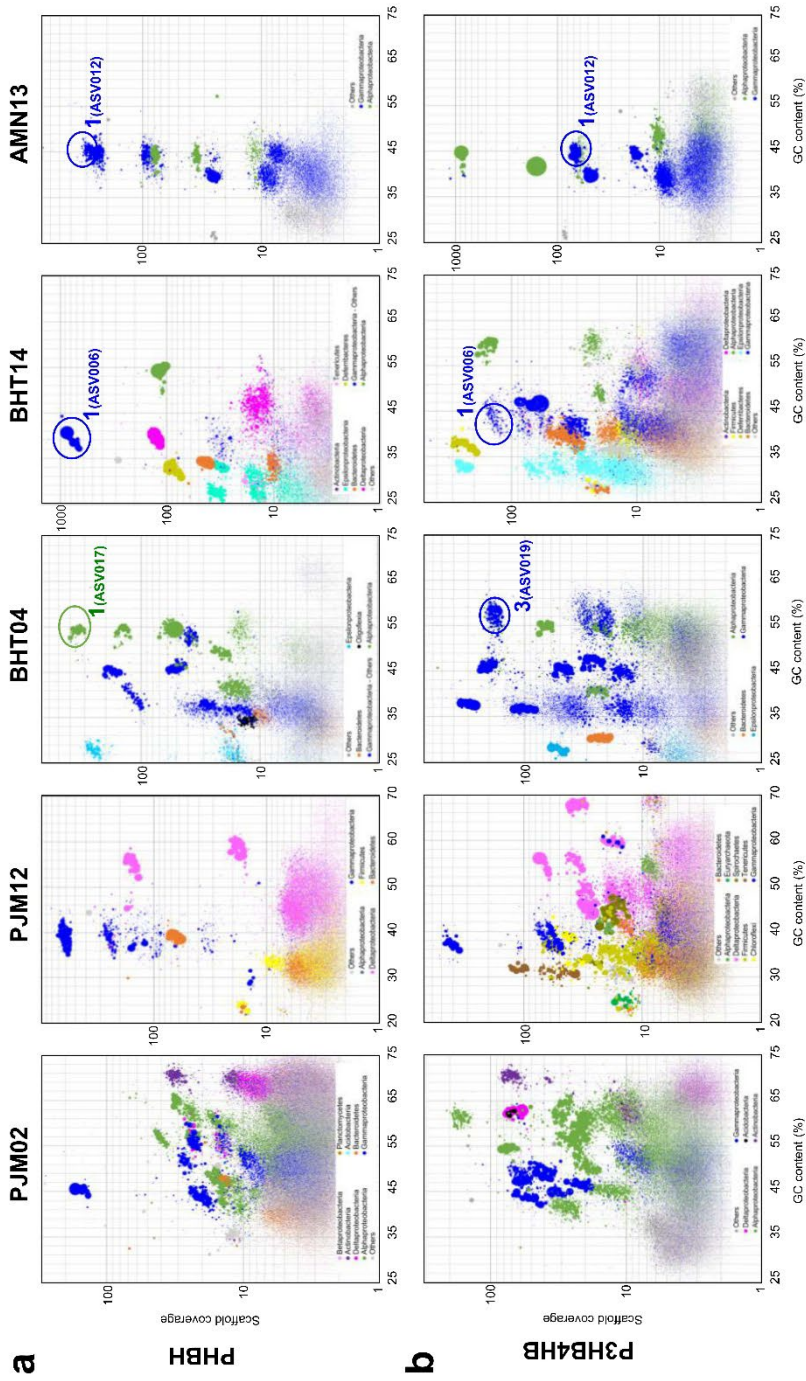

**Supplementary Fig. 27 | Genome clustering from metagenome sequences of plastisphere for a, PHBH and b, P3HB4HB established under oceanic condition.** Genome clusters from the assembled scaffolds from metagenomic sequences of plastisphere under different oceanic location, water depth, and time were identified using the estimated taxonomic classification (color of dots), length (size of dots), GC content (X-axis) and mean coverage of scaffold (Y-axis).

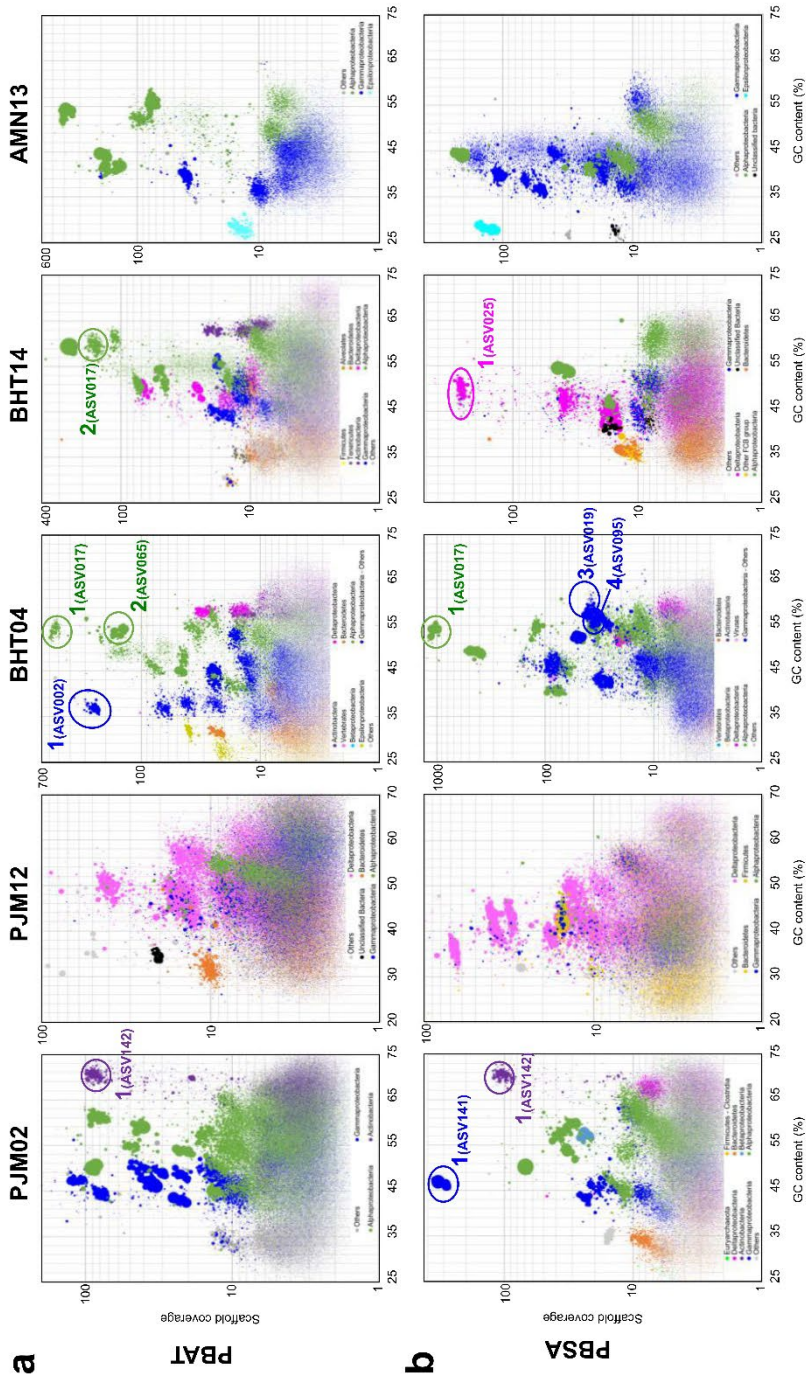

**Supplementary Fig. 28 | Genome clustering from metagenome sequences of plastisphere for a, PBAT and b, PBSA established under oceanic condition.**

Genome clusters from the assembled scaffolds from metagenomic sequences of plastisphere under different oceanic location, water depth, and time were identified using the estimated taxonomic classification (color of dots), length (size of dots), GC content (X-axis) and mean coverage of scaffold (Y-axis).



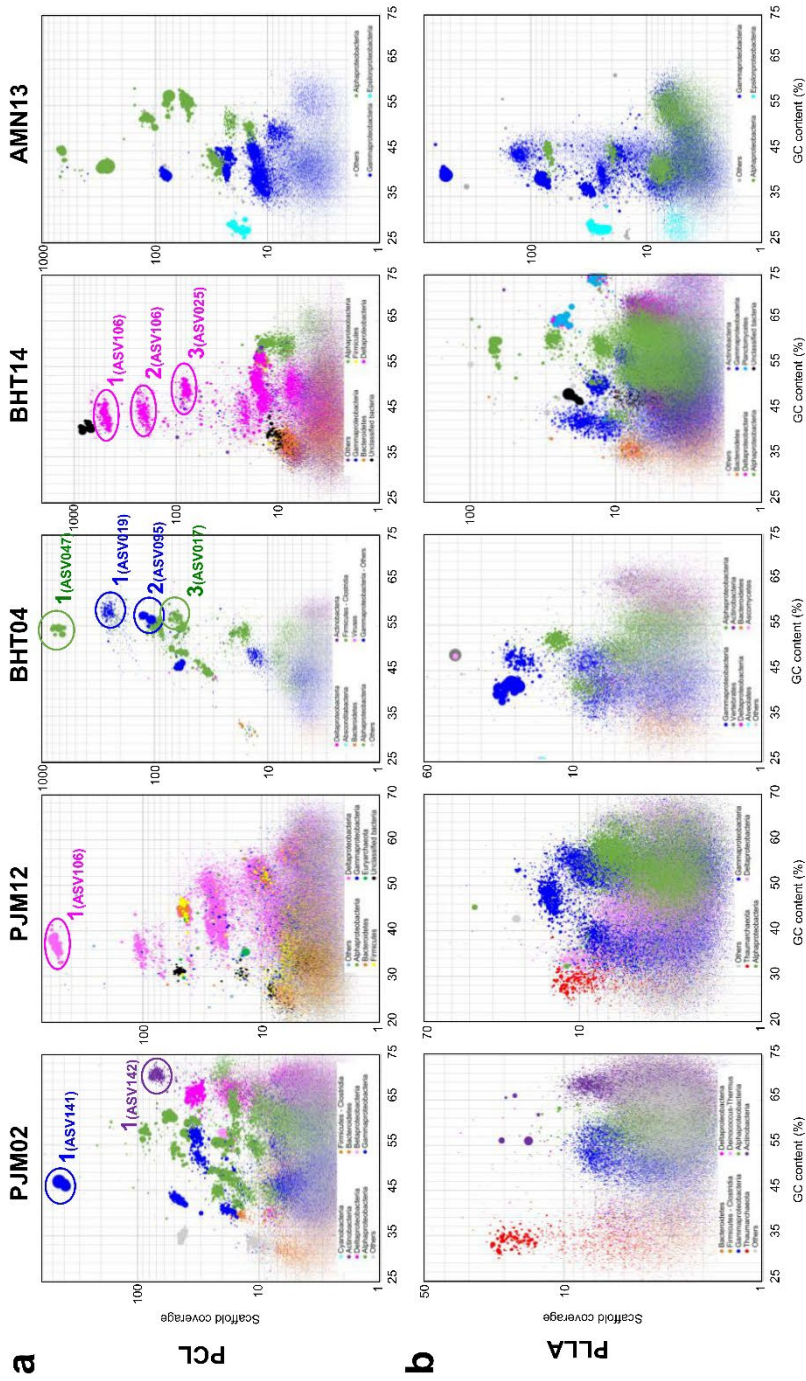

**Supplementary Fig. 29 | Genome clustering from metagenome sequences of plastisphere for a, PCL and b, PLLA established under oceanic condition.**

Genome clusters from the assembled scaffolds from metagenomic sequences of plastisphere under different oceanic location, water depth, and time were identified using the estimated taxonomic classification (color of dots), length (size of dots), GC content (X-axis) and mean coverage of scaffold (Y-axis).

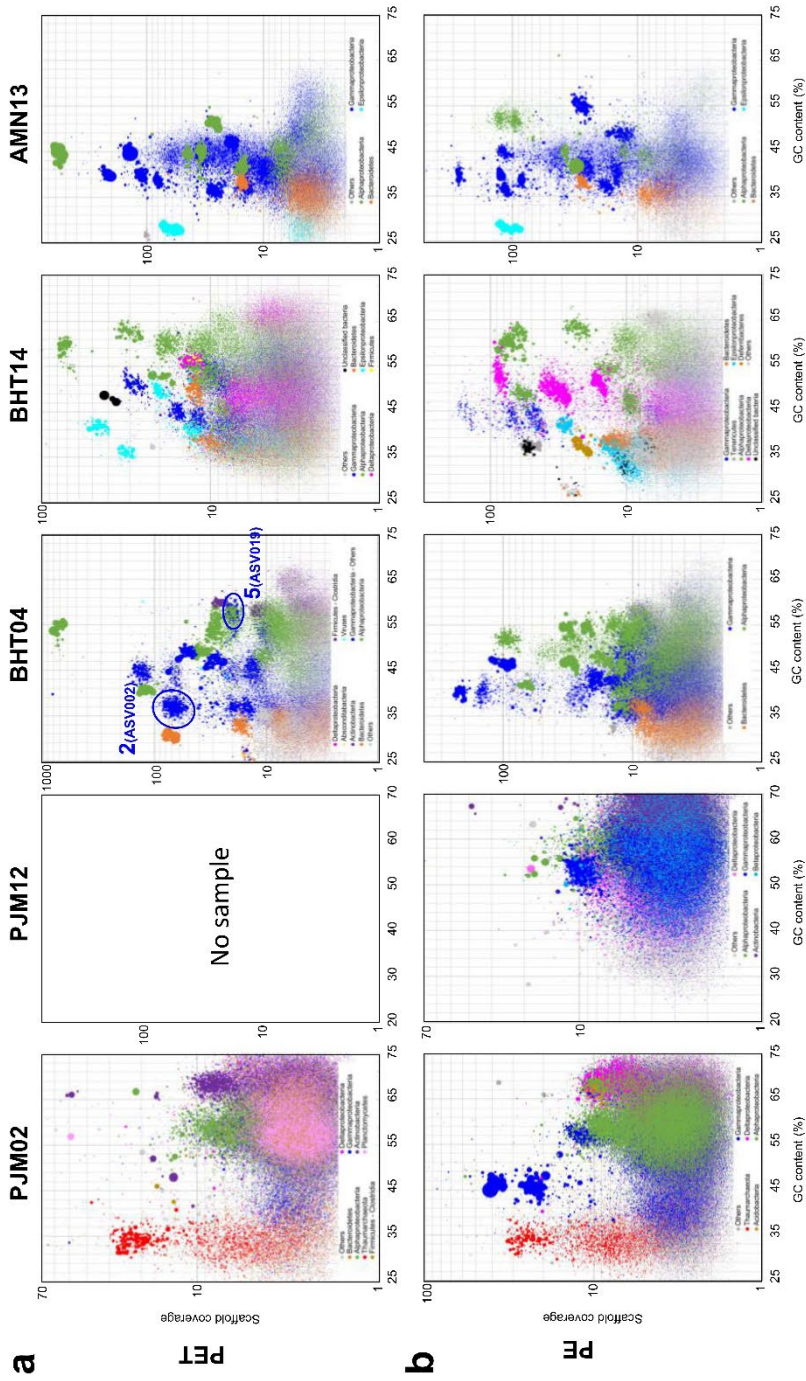

**Supplementary Fig. 30 | Genome clustering from metagenome sequences of plastisphere for a, PET and b, PE established under oceanic condition.**

Genome clusters from the assembled scaffolds from metagenomic sequences of plastisphere under different oceanic location, water depth, and time were identified using the estimated taxonomic classification (color of dots), length (size of dots), GC content (X-axis) and mean coverage of scaffold (Y-axis).

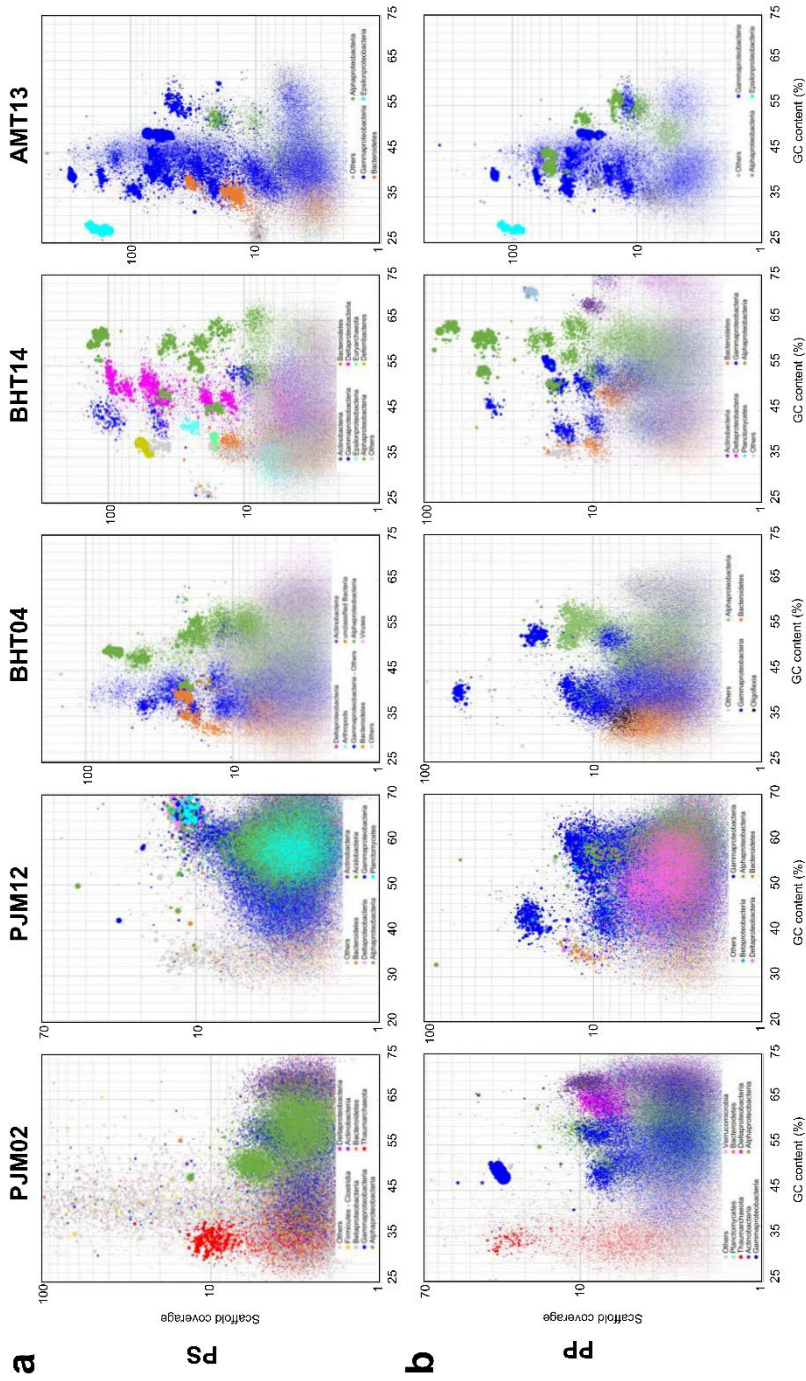

**Supplementary Fig. 31 | Genome clustering from metagenome sequences of plastisphere for a, PS and b, PP established under oceanic condition.**

Genome clusters from the assembled scaffolds from metagenomic sequences of plastisphere under different oceanic location, water depth, and time were identified using the estimated taxonomic classification (color of dots), length (size of dots), GC content (X-axis) and mean coverage of scaffold (Y-axis).

**Supplementary Table 1 | Detail of samples placed for 3 months at BHT (BHT03).**

| Sample  | Weight decrease<br>/ mg | Weight loss<br>/ wt% | Thickness <sub>(before)</sub><br>/ $\mu\text{m}$ | Thickness <sub>(after)</sub><br>/ $\mu\text{m}$ | Biodegradation rate<br>/ $\mu\text{g}\cdot\text{cm}^{-2}\cdot\text{day}^{-1}$ |
|---------|-------------------------|----------------------|--------------------------------------------------|-------------------------------------------------|-------------------------------------------------------------------------------|
| PHB     | 60.9±6.8                | 10.9±1.6             | 308.2±17.7                                       | 275.7±7.3                                       | 19.8±2.3                                                                      |
| PHBV    | 65.4±19.8               | 16.8±5.5             | 216.4±13.5                                       | 200.6±5.0                                       | 22.0±6.6                                                                      |
| PHBH    | 86.9±19.8               | 21.6±6.5             | 221.6±20.7                                       | 189.9±24.6                                      | 28.6±6.7                                                                      |
| P3HB4HB | 140.0±35.3              | 26.3±6.6             | 290.1±14.8                                       | 258.5±2.7                                       | 45.8±11.5                                                                     |
| PCL     | 8.9±1.0                 | 1.9±0.1              | 262.7±39.9                                       | 266.3±38.0                                      | 2.9±0.3                                                                       |
| PBS     | 0.0±5.0                 | 0.0±0.9              | 266.4±22.9                                       | 278.9±18.8                                      | 0.0±0.1                                                                       |
| PBSA    | 10.3±1.4                | 1.8±0.0              | 291.4±0.0                                        | 291.1±0.0                                       | 3.4±0.0                                                                       |
| PBAT    | 6.8±0.3                 | 1.5±0.0              | 240.4±21.6                                       | 243.4±11.2                                      | 2.2±0.1                                                                       |
| PLLA    | -0.3±0.7                | 0.0±0.1              | 273.9±23.8                                       | 280.8±18.5                                      | -0.1±0.2                                                                      |
| PP      | 0.1±0.2                 | 0.0±0.1              | 219.9±21.7                                       | 220.7±17.7                                      | 0.0±0.1                                                                       |
| PE      | 0.2±0.1                 | 0.1±0.0              | 268.5±4.7                                        | 260.6±-1.4                                      | 0.1±0.0                                                                       |
| PS      | -0.4±0.4                | -0.1±0.1             | 110.5±0.1                                        | 102.7±-0.3                                      | -0.1±0.1                                                                      |
| PET     | 0.2±0.1                 | 0.1±0.0              | 240.9±16.5                                       | 232.9±15.7                                      | 0.1±0.0                                                                       |

**Supplementary Table 2 | Detail of samples placed for 8 months at BHT (BHT08).**

| Sample  | Weight decrease<br>/ mg | Weight loss<br>/ wt% | Thickness <sub>(before)</sub><br>/ $\mu\text{m}$ | Thickness <sub>(after)</sub><br>/ $\mu\text{m}$ | Biodegradation rate<br>/ $\mu\text{g}\cdot\text{cm}^{-2}\cdot\text{day}^{-1}$ |
|---------|-------------------------|----------------------|--------------------------------------------------|-------------------------------------------------|-------------------------------------------------------------------------------|
| PHB     | 195.5±19.3              | 35.5±3.6             | 287.3±11.8                                       | 226.6±14.4                                      | 24.4±2.4                                                                      |
| PHBV    | 213.2±25.4              | 46.3±9.3             | 253.1±22.8                                       | 170.8±34.6                                      | 27.1±3.2                                                                      |
| PHBH    | 219.8±44.8              | 51.8±11.1            | 229.0±21.9                                       | 154.6±29.6                                      | 27.5±5.6                                                                      |
| P3HB4HB | 529.1±60.1              | 90.8±11.1            | 313.6±29.1                                       | 102.8±84.4                                      | 65.1±7.8                                                                      |
| PCL     | 10.8±1.5                | 2.3±0.2              | 289.8±25.9                                       | 266.8±19.5                                      | 1.3±0.2                                                                       |
| PBS     | 3.4±0.4                 | 0.7±0.1              | 267.1±18.4                                       | 260.6±20.2                                      | 0.4±0.0                                                                       |
| PBSA    | 12.0±0.9                | 2.2±0.0              | 307.4±0.0                                        | 281.8±0.0                                       | 1.5±0.0                                                                       |
| PBAT    | 8.0±0.5                 | 1.7±0.1              | 252.0±24.1                                       | 241.6±26.3                                      | 1.0±0.1                                                                       |
| PLLA    | 0.3±0.2                 | 0.1±0.0              | 285.3±13.5                                       | 281.1±16.2                                      | 0.0±0.0                                                                       |
| PP      | 0.2±0.0                 | 0.1±0.0              | 214.7±20.5                                       | 211.3±28.5                                      | 0.0±0.0                                                                       |
| PE      | 0.3±0.3                 | 0.1±0.1              | 258.8±40.0                                       | 241.6±29.4                                      | 0.0±0.0                                                                       |
| PS      | 0.2±0.1                 | 0.0±0.0              | 277.0±32.6                                       | 246.1±36.9                                      | 0.0±0.0                                                                       |
| PET     | 0.4±0.3                 | 0.2±0.1              | 104.4±0.0                                        | 95.8±0.4                                        | 0.0±0.0                                                                       |

**Supplementary Table 3 | Biodegradation rate of injection-molded plastic samples.**

| Place | Biodegradation rate / $\mu\text{g}\cdot\text{cm}^{-2}\cdot\text{day}^{-1}$ |       |       |         |      |      |      |      |      |     |      |       |      |
|-------|----------------------------------------------------------------------------|-------|-------|---------|------|------|------|------|------|-----|------|-------|------|
|       | PHB                                                                        | PHBV  | PHBH  | P3HB4HB | PBS  | PBSA | PCL  | PBAT | PLLA | PP  | LDPE | PET   | PS   |
| PJM12 | 191.0                                                                      | 145.1 | 188.2 | 173.0   | 7.4  | 41.2 | 51.6 | 22.3 | -0.7 | 0.0 | 0.4  | 0.2   | -0.1 |
| BHT04 | 3.2                                                                        | 6.4   | 5.3   | 28.1    | -2.1 | 7.3  | 7.0  | 16.1 | -1.5 | 0.2 | 0.9  | -58.2 | 1.2  |
| BHT14 | 19.2                                                                       | 20.3  | 23.6  | 35.3    | -0.3 | 1.8  | 2.9  | 5.1  | -0.2 | 0.0 | 0.3  | 0.2   | 0.4  |
| AMN13 | 5.2                                                                        | 2.3   | 2.1   | 5.8     | -1.4 | 0.1  | 1.4  | 2.3  | -1.3 | 0.0 | 0.0  | 0.1   | 0.0  |

**Supplementary Table 4 | Biodegradation rates of various melt-pressed PHA and biodegradable polyester films.**

| Place | Biodegradation rate / $\mu\text{g}\cdot\text{cm}^{-2}\cdot\text{day}^{-1}$ |            |            |            |         |          |           |           |          |
|-------|----------------------------------------------------------------------------|------------|------------|------------|---------|----------|-----------|-----------|----------|
|       | PHB                                                                        | PHBV       | PHBH       | P3HB4HB    | PBS     | PBSA     | PCL       | PBAT      | PLLA     |
| PJM02 | 106.6±29.3                                                                 | 122.5±19.7 | 121.3±27.8 | 147.7±17.6 | 7.8±3.2 | 91.0±8.4 | 118.1±9.8 | 49.1±15.9 | 0.4±0.1  |
| BHT03 | 19.8±2.3                                                                   | 22.0±6.6   | 28.6±6.7   | 45.8±11.5  | 0.0±0.1 | 3.4±0.4  | 2.9±0.3   | 2.2±0.1   | -0.1±0.2 |
| BHT08 | 24.4±2.4                                                                   | 27.1±3.2   | 27.5±5.6   | 65.1±7.8   | 0.4±0.0 | 1.5±0.0  | 1.3±0.2   | 1.0±0.1   | 0.0±0.0  |
| BMS05 | 12.8±2.3                                                                   | 17.6±1.6   | 13.3±2.1   | 31.3±6.0   | 2.2±0.1 | 2.4±0.3  | 2.9±0.4   | 2.3±0.2   | 0.0±0.1  |
| BMJ05 | 10.9±1.1                                                                   | n.d.       | n.d.       | n.d.       | 0.1±0.0 | 0.4±0.1  | 2.5±0.4   | 0.3±0.1   | 0.1±0.1  |
| AKR05 | 5.5±2.0                                                                    | n.d.       | n.d.       | n.d.       | 0.3±0.2 | 0.3±0.1  | 0.8±0.0   | 0.3±0.2   | 0.1±0.1  |
| AMN13 | 4.7                                                                        | 4.9        | 3.2        | 4.4        | 0.1     | 1.8      | 1.0       | 2.3       | 0.7      |

**Supplementary Table 5 | Detail of samples placed for 2 months at PJM (PJM02).**

| Sample  | Weight decrease<br>/ mg | Weight loss<br>/ wt% | Thickness <sub>(before)</sub><br>/ $\mu\text{m}$ | Thickness <sub>(after)</sub><br>/ $\mu\text{m}$ | Biodegradation rate<br>/ $\mu\text{g}\cdot\text{cm}^{-2}\cdot\text{day}^{-1}$ |
|---------|-------------------------|----------------------|--------------------------------------------------|-------------------------------------------------|-------------------------------------------------------------------------------|
| PHB     | 208.7±58.3              | 30.7±6.2             | 342.1±44.6                                       | 303.8±37.9                                      | 106.6±29.3                                                                    |
| PHBV    | 243.7±37.1              | 42.6±8.2             | 308.8±21.9                                       | 228.4±21.4                                      | 122.5±19.7                                                                    |
| PHBH    | 238.6±53.3              | 39.9±11.6            | 324.8±27.4                                       | 247.4±43.8                                      | 121.3±27.8                                                                    |
| P3HB4HB | 292.1±34.0              | 39.1±5.2             | 395.3±40.5                                       | 301.0±42.0                                      | 147.7±17.6                                                                    |
| PCL     | 233.1±20.1              | 34.0±4.5             | 385.6±50.6                                       | 306.7±38.3                                      | 118.1±9.8                                                                     |
| PBS     | 15.6±6.5                | 2.7±1.0              | 297.2±21.6                                       | 296.5±16.2                                      | 7.8±3.2                                                                       |
| PBSA    | 181.2±14.4              | 31.2±4.5             | 314.8±27.3                                       | 254.9±32.5                                      | 91.0±8.4                                                                      |
| PBAT    | 97.9±31.1               | 12.4±3.9             | 383.8±20.3                                       | 370.3±20.4                                      | 49.1±15.9                                                                     |
| PLLA    | 0.8±0.2                 | 0.1±0.0              | 353.7±19.6                                       | 345.5±20.9                                      | 0.4±0.1                                                                       |
| PP      | -1.3±0.5                | -0.2±0.1             | 391.2±46.2                                       | 424.8±25.2                                      | -0.7±0.3                                                                      |
| PE      | -0.1±1.2                | 0.0±0.2              | 493.8±60.2                                       | 486.4±71.2                                      | 0.0±0.6                                                                       |
| PS      | -0.8±0.4                | 0.0±0.1              | 404.9±32.1                                       | 409.8±34.2                                      | -0.4±0.2                                                                      |
| PET     | -0.1±0.6                | -0.1±0.3             | 112.3±3.1                                        | 106.2±2.4                                       | -0.1±0.3                                                                      |



**Supplementary Table 6 | Detail of samples placed for 5 months at BMS (BMS05).**

| Sample  | Weight decrease<br>/ mg | Weight loss<br>/ wt% | Thickness <sub>(before)</sub><br>/ $\mu\text{m}$ | Thickness <sub>(after)</sub><br>/ $\mu\text{m}$ | Biodegradation rate<br>/ $\mu\text{g}\cdot\text{cm}^{-2}\cdot\text{day}^{-1}$ |
|---------|-------------------------|----------------------|--------------------------------------------------|-------------------------------------------------|-------------------------------------------------------------------------------|
| PHB     | 56.1±10.5               | 10.7±3.0             | 346.8±34.7                                       | 272.1±38.7                                      | 12.8±2.3                                                                      |
| PHBV    | 76.3±8.0                | 15.1±3.1             | 304.6±44.4                                       | 256.0±42.0                                      | 17.6±1.6                                                                      |
| PHBH    | 58.8±9.1                | 9.1±1.0              | 333.0±26.8                                       | 317.9±24.3                                      | 13.3±2.1                                                                      |
| P3HB4HB | 136.1±25.7              | 20.1±3.8             | 364.7±22.5                                       | 318.4±21.5                                      | 31.3±6.0                                                                      |
| PCL     | 12.7±1.6                | 1.6±0.1              | 437.2±32.4                                       | 443.4±29.9                                      | 2.9±0.4                                                                       |
| PBS     | 9.9±0.3                 | 2.0±0.3              | 261.2±22.9                                       | 252.5±22.7                                      | 2.2±0.1                                                                       |
| PBSA    | 10.5±1.4                | 1.6±0.1              | 349.5±43.0                                       | 330.2±35.0                                      | 2.4±0.3                                                                       |
| PBAT    | 10.2±1.0                | 1.3±0.1              | 394.4±52.2                                       | 399.2±56.6                                      | 2.3±0.2                                                                       |
| PLLA    | -0.1±0.4                | 0.0±0.1              | 317.6±69.7                                       | 304.0±26.6                                      | 0.0±0.1                                                                       |
| PP      | -0.1±0.2                | 0.0±0.0              | 469.4±54.8                                       | 375.8±47.4                                      | 0.0±0.0                                                                       |
| PE      | 0.0±0.1                 | 0.0±0.0              | 276.8±14.2                                       | 257.5±8.3                                       | 0.0±0.0                                                                       |
| PS      | -1.2±0.1                | -0.2±0.0             | 376.1±54.7                                       | 362.9±44.5                                      | -0.3±0.0                                                                      |
| PET     | 0.0±0.0                 | 0.0±0.0              | 140.2±12.8                                       | 98.9±0.9                                        | 0.0±0.0                                                                       |

**Supplementary Table 7 | The weight-loss of polysaccharide esters derivatives films.**

| Place | Weight-loss / wt% |      |      |      |      |      |      |      |      |
|-------|-------------------|------|------|------|------|------|------|------|------|
|       | CE                | CEA  | CETA | PR   | PRA  | PRTA | MU   | MUA  | MUTA |
| PJM02 | 100.0             | 89.6 | 12.1 | 86.4 | -1.6 | 20.3 | 82.8 | 10.5 | 12.0 |
| BHT14 | 16.0              | 11.2 | 17.8 | 31.6 | 8.6  | 27.6 | 10.6 | 14.5 | 19.7 |
| AMN13 | 10.7              | 4.1  | 11.5 | 7.5  | -1.1 | -0.8 | -2.2 | 10.8 | 11.5 |

Supplementary Table 8 | Stats for metagenomic assemblies of plastisphere at the sea.

| Sites                    | Plastics                 | No. of sequence reads | No. of mapped reads to scaffolds | Total bases (bp) | No. Scaffolds | No. ORFs    | Opt. Temp. (°C) | Zc      | Community header |             |           |
|--------------------------|--------------------------|-----------------------|----------------------------------|------------------|---------------|-------------|-----------------|---------|------------------|-------------|-----------|
| PJM02                    | PHAs                     | PHB                   | 63,657,156                       | 30,009,225       | 278,378,781   | 229,659     | 375,977         | 25.8    | -0.142           | P3HBx1J0    |           |
|                          |                          | PHBV                  | 42,053,848                       | 26,821,635       | 236,142,568   | 165,658     | 329,451         | 33.0    | -0.125           | PHBVJ0      |           |
|                          |                          | PHBH                  | 59,318,544                       | 28,760,180       | 387,517,549   | 307,419     | 572,164         | 28.8    | -0.135           | PHBHJ0      |           |
|                          |                          | P3HB4HB               | 49,119,126                       | 38,601,663       | 265,344,151   | 150,104     | 358,120         | 27.1    | -0.134           | P4HBJ0      |           |
|                          | biodegradable polyesters | PBAT                  | 57,343,266                       | 34,737,377       | 310,571,323   | 217,966     | 451,751         | 27.6    | -0.139           | EcoflexJ0   |           |
|                          |                          | PBSA                  | 46,786,658                       | 29,909,958       | 254,983,246   | 171,295     | 369,354         | 28.8    | -0.139           | PBSAJ0      |           |
|                          |                          | PBS                   | 61,568,798                       | 20,168,669       | 260,465,820   | 235,482     | 410,602         | 28.8    | -0.127           | PBSJ0       |           |
|                          |                          | PCL                   | 72,922,830                       | 50,189,626       | 415,487,352   | 274,798     | 584,398         | 28.6    | -0.137           | PCLJ0       |           |
|                          |                          | PLLA                  | 49,813,652                       | 4,006,855        | 101,007,345   | 133,648     | 190,384         | 33.0    | -0.128           | PLLAJ0      |           |
|                          |                          | PET                   | 35,082,442                       | 2,967,428        | 132,749,920   | 183,385     | 249,466         | 35.4    | -0.131           | PETJ0       |           |
|                          | common                   | PE                    | 56,323,142                       | 8,855,751        | 215,003,864   | 253,909     | 369,428         | 36.2    | -0.134           | LDPEJ0      |           |
|                          |                          | PS                    | 35,676,402                       | 5,779,442        | 95,187,166    | 137,881     | 101,395         | 32.8    | -0.140           | PSJ0        |           |
|                          |                          | PP                    | 69,876,690                       | 9,484,315        | 207,208,658   | 246,290     | 352,336         | 33.4    | -0.133           | PPJ0        |           |
|                          |                          |                       |                                  |                  |               |             |                 |         |                  |             |           |
| PJM12                    | PHAs                     | PHB                   | 23,266,982                       | 19,654,896       | 92,771,385    | 69,489      | 135,640         | 29.5    | -0.164           | A6P3HBJ1    |           |
|                          |                          | PHBV                  | 45,922,320                       | 41,309,739       | 109,881,412   | 71,843      | 152,731         | 30.3    | -0.165           | C7PHBVJ1    |           |
|                          |                          | PHBH                  | 50,126,496                       | 45,439,951       | 82,229,992    | 54,569      | 119,945         | 30.8    | -0.162           | E6PHBHJ1    |           |
|                          |                          | P3HB4HB               | 47,017,780                       | 40,741,922       | 266,734,324   | 123,709     | 334,218         | 36.6    | -0.171           | G7P4BHJ1    |           |
|                          | biodegradable polyesters | PBAT                  | 52,133,952                       | 13,948,188       | 260,742,308   | 242,190     | 411,886         | 33.6    | -0.166           | A8EcoflexJ1 |           |
|                          |                          | PBSA                  | 37,322,874                       | 18,355,420       | 224,885,468   | 164,445     | 316,331         | 31.2    | -0.172           | B8PBSAJ1    |           |
|                          |                          | PCL                   | 55,680,592                       | 41,040,080       | 253,163,885   | 179,210     | 352,422         | 28.7    | -0.179           | B9PCLJ1     |           |
|                          |                          | PLLA                  | 56,065,394                       | 5,254,785        | 154,285,706   | 194,132     | 284,779         | 34.9    | -0.148           | C9PLLAJ1    |           |
|                          |                          | PET                   | 45,448,040                       | 3,969,254        | 134,548,675   | 174,260     | 253,278         | 33.8    | -0.139           | G8LDPEJ1    |           |
|                          |                          | PS                    | 63,535,638                       | 4,629,370        | 148,014,386   | 196,718     | 283,065         | 39.6    | -0.134           | G9PSJ1      |           |
|                          | common                   | PP                    | 44,075,486                       | 6,211,090        | 163,025,025   | 181,201     | 285,031         | 33.9    | -0.146           | F9PPJ1      |           |
|                          |                          |                       |                                  |                  |               |             |                 |         |                  |             |           |
|                          | BHT04                    | PHAs                  | PHB                              | 82,147,782       | 74,923,722    | 182,494,978 | 104,721         | 247,090 | 15.8             | -0.149      | A6P3HB    |
|                          |                          |                       | PHBV                             | 64,812,168       | 58,579,753    | 232,290,094 | 104,226         | 282,518 | 22.9             | -0.153      | C7PHBV    |
| PHBH                     |                          |                       | 47,604,546                       | 42,784,603       | 132,803,468   | 61,576      | 167,402         | 24.1    | -0.161           | E6PHBH      |           |
| P3HB4HB                  |                          |                       | 54,555,588                       | 49,458,423       | 149,841,116   | 78,539      | 199,784         | 24.1    | -0.157           | G7P4BH      |           |
| biodegradable polyesters |                          | PBAT                  | 77,449,734                       | 67,551,185       | 305,344,113   | 171,670     | 399,932         | 21.8    | -0.153           | A8Ecoflex   |           |
|                          |                          | PBSA                  | 81,400,242                       | 72,179,437       | 216,488,780   | 120,954     | 282,394         | 22.1    | -0.148           | B8PBSA      |           |
|                          |                          | PCL                   | 58,436,592                       | 52,879,819       | 126,574,727   | 72,778      | 171,274         | 24.1    | -0.141           | B9PCL       |           |
|                          |                          | PLLA                  | 12,600,822                       | 4,167,724        | 77,910,307    | 76,487      | 124,685         | 25.4    | -0.153           | C9PLLA      |           |
|                          |                          | PET                   | 59,591,110                       | 50,783,177       | 207,664,125   | 124,706     | 275,794         | 21.7    | -0.153           | C5PET       |           |
|                          |                          | PE                    | 44,292,228                       | 28,859,392       | 259,753,657   | 188,352     | 378,121         | 24.4    | -0.153           | G8LDPE      |           |
| common                   |                          | PS                    | 49,164,004                       | 25,719,217       | 304,294,407   | 246,958     | 467,798         | 25.6    | -0.157           | G9PS        |           |
|                          |                          | PP                    | 29,810,292                       | 10,971,980       | 208,597,656   | 195,491     | 331,074         | 24.0    | -0.152           | F9PP        |           |
| BHT14                    |                          | PHAs                  | PHB                              | 51,000,188       | 44,365,457    | 194,259,820 | 99,601          | 243,152 | 28.6             | -0.174      | A6P3HBT2  |
|                          |                          |                       | PHBV                             | 54,569,286       | 49,078,825    | 103,244,766 | 51,927          | 132,028 | 27.3             | -0.167      | C7PHBVT2  |
|                          | PHBH                     |                       | 39,961,876                       | 33,745,761       | 78,636,509    | 36,757      | 98,919          | 28.9    | -0.174           | E6PHBHT2    |           |
|                          | P3HB4HB                  |                       | 68,415,798                       | 40,296,848       | 216,456,195   | 134,016     | 288,620         | 30.6    | -0.186           | G7P4BHT2    |           |
|                          | biodegradable polyesters | PBAT                  | 49,902,238                       | 39,109,600       | 277,380,367   | 176,551     | 386,366         | 24.5    | -0.153           | A8EcoflexT2 |           |
|                          |                          | PBSA                  | 26,759,090                       | 19,069,594       | 131,516,182   | 101,022     | 190,834         | 33.7    | -0.176           | B8PBSAT2    |           |
|                          |                          | PCL                   | 47,562,104                       | 38,754,135       | 130,034,674   | 89,264      | 182,400         | 27.1    | -0.191           | B9PCLT2     |           |
|                          |                          | PLLA                  | 46,614,676                       | 17,231,920       | 323,371,796   | 289,439     | 512,562         | 25.4    | -0.147           | C9PLLAT2    |           |
|                          |                          | PET                   | 45,856,870                       | 20,149,972       | 310,724,855   | 250,833     | 467,488         | 26.2    | -0.162           | C5PETT2     |           |
|                          |                          | PE                    | 41,269,208                       | 28,513,142       | 230,071,511   | 146,652     | 316,531         | 27.4    | -0.170           | G8LDPET2    |           |
|                          | common                   | PS                    | 43,209,890                       | 21,667,334       | 238,667,503   | 159,189     | 332,956         | 23.9    | -0.148           | G9PST2      |           |
|                          |                          | PP                    | 48,753,482                       | 30,915,649       | 265,738,740   | 189,617     | 380,015         | 27.4    | -0.171           | F9PPT2      |           |
|                          | AMN13                    | PHAs                  | PHB                              | 59,261,140       | 56,306,024    | 54,568,968  | 28,911          | 71,994  | 16.3             | -0.138      | T50P3HB   |
|                          |                          |                       | PHBV                             | 55,746,868       | 53,340,234    | 50,844,397  | 28,164          | 67,380  | 5.6              | -0.117      | T52PHBV   |
| PHBH                     |                          |                       | 58,798,184                       | 55,879,575       | 42,382,667    | 22,033      | 54,512          | 7.9     | -0.119           | T54PHBH     |           |
| P3HB4HB                  |                          |                       | 47,133,656                       | 44,650,207       | 58,660,684    | 34,295      | 78,979          | 13.1    | -0.137           | T57P4BH     |           |
| biodegradable polyesters |                          | PBAT                  | 33,480,472                       | 31,661,521       | 68,301,009    | 29,361      | 85,169          | 20.8    | -0.158           | T58Ecoflex  |           |
|                          |                          | PBSA                  | 35,331,670                       | 30,658,999       | 113,836,609   | 53,037      | 141,832         | 24.4    | -0.166           | T60PBSA     |           |
|                          |                          | PCL                   | 42,166,594                       | 39,883,021       | 106,293,006   | 34,185      | 121,200         | 20.5    | -0.156           | T61PCL      |           |
|                          |                          | PLLA                  | 53,718,346                       | 48,084,846       | 137,676,553   | 76,392      | 180,573         | 23.2    | -0.168           | T62PLLA     |           |
|                          |                          | PET                   | 36,198,300                       | 32,212,918       | 112,326,015   | 73,290      | 158,052         | 22.8    | -0.164           | T702PET     |           |
|                          |                          | PE                    | 49,501,666                       | 43,122,330       | 134,868,147   | 68,119      | 169,977         | 23.0    | -0.162           | T68LDPE     |           |
| common                   |                          | PS                    | 71,211,024                       | 59,147,875       | 145,104,539   | 84,889      | 188,597         | 22.3    | -0.161           | T69PS       |           |
|                          |                          | PP                    | 30,950,364                       | 26,949,100       | 130,150,162   | 57,328      | 158,668         | 24.0    | -0.165           | T67PP       |           |
| BHT                      |                          | Water                 | WaterBHT*                        | 123,819,272      | 50,970,849    | 397,329,399 | 344,455         | 632,827 | 32.6             | -0.160      | waterBHTc |
|                          |                          |                       | WaterBHT                         | 113,954,372      | 48,916,098    | 397,509,359 | 335,541         | 624,781 | 32.9             | -0.159      | waterBHT  |
|                          | sediment                 | BHT1cm*               | 100,868,178                      | 10,293,915       | 221,857,546   | 265,699     | 411,503         | 39.3    | -0.156           | BHTw1cm     |           |
|                          |                          | BHT1cm                | 93,981,822                       | 7,916,358        | 179,845,622   | 221,439     | 314,965         | 41.3    | -0.153           | BHT1cm      |           |
|                          |                          | BHT3cm                | 94,759,232                       | 9,456,227        | 199,380,741   | 245,949     | 347,230         | 41.4    | -0.159           | BHT3cm      |           |
|                          |                          | BHT5cm                | 103,470,332                      | 8,565,139        | 177,906,659   | 226,980     | 315,743         | 41.8    | -0.161           | BHT5cm      |           |
| BHT10cm                  | 103,820,422              | 37,877,736            | 355,801,248                      | 344,162          | 599,320       | 57.4        | -0.182          | BHT10cm |                  |             |           |

**Supplementary Table 9 | Minimum information of metagenome-assembled genome (MiMAG) and GBDBtk taxonomy of MAGs.**

| Site_Plastic_MAG ID | GBDBtk taxonomy  |                      |                         |                           |                      | G+C content | Genome size (bp) | N50 of scaffolds (bp) | No. contigs | No. scaffolds | CheckM           |                   | rRNAmmer |          |          | tRNA-scan |                            |
|---------------------|------------------|----------------------|-------------------------|---------------------------|----------------------|-------------|------------------|-----------------------|-------------|---------------|------------------|-------------------|----------|----------|----------|-----------|----------------------------|
|                     | Phylum           | Class                | Order                   | family                    | genus                |             |                  |                       |             |               | Completeness (%) | Contamination (%) | 5s rRNA  | 16s rRNA | 23s rRNA | No. tRNA  | No. of AA missing in tRNAs |
|                     |                  |                      |                         |                           |                      |             |                  |                       |             |               |                  |                   |          |          |          |           |                            |
| BHT04_PHB_gam2      | Proteobacteria   | Gamma proteobacteria | Enterobacteriales       | Alteromonadaceae          | <b>Colwellia</b>     | 37.2%       | 3,890,228        | 11,196                | 700         | 641           | 95.1             | 5.0               | 3        | 1        | 1        | 58        | 0                          |
| BHT04_PHB_gam1      | Proteobacteria   | Gamma proteobacteria | Pseudomonadales         | Cellvibrionaceae          | <b>Agarilytica</b>   | 44.6%       | 5,302,014        | 129,448               | 112         | 98            | 99.1             | 1.4               | 1        | 1        | 1        | 41        | 1                          |
| AMN13_PHB_gam1      | Proteobacteria   | Gamma proteobacteria | Pseudomonadales         | Cellvibrionaceae          | <b>Agarilytica</b>   | 44.7%       | 5,420,529        | 80,306                | 143         | 125           | 99.1             | 2.1               | 0        | 0        | 0        | 39        | 1                          |
| BHT14_PHBH_gam1     | Proteobacteria   | Gamma proteobacteria | <b>QZLD01</b>           | QZLD01                    | QZLE01               | 39.2%       | 3,108,749        | 264,084               | 26          | 26            | 93.7             | 1.6               | 1        | 1        | 1        | 35        | 0                          |
| PJM12_PHB_gam1      | Proteobacteria   | Gamma proteobacteria | <b>QZLD01</b>           | QZLD01                    | QZLE01               | 38.9%       | 3,154,396        | 257,928               | 50          | 46            | 94.1             | 1.7               | 0        | 0        | 0        | 33        | 1                          |
| PJM12_PHB_gam2      | Proteobacteria   | Gamma proteobacteria | <b>QZLD01</b>           | QZLD01                    | QZLE01               | 38.6%       | 3,263,329        | 107,260               | 80          | 58            | 92.3             | 1.7               | 0        | 0        | 0        | 32        | 1                          |
| BHT04_PCL_gam1      | Proteobacteria   | Gamma proteobacteria | Granulosicoccales       | <b>Granulosicoccaceae</b> |                      | 57.1%       | 6,319,541        | 23,423                | 688         | 642           | 95.3             | 6.6               | 2        | 1        | 1        | 40        | 0                          |
| PJM02_PBSA_gam1     | Proteobacteria   | Gamma proteobacteria | Pseudomonadales         | <b>Cellvibrionaceae</b>   |                      | 46.7%       | 4,307,390        | 716,172               | 18          | 14            | 98.6             | 1.4               | 0        | 1        | 1        | 37        | 0                          |
| BHT04_PCL_gam2      | Proteobacteria   | Gamma proteobacteria | Pseudomonadales         | Pseudomonadaceae          | <b>Pseudomonas_D</b> | 56.5%       | 3,889,687        | 1,039,964             | 27          | 23            | 100.0            | 1.0               | 1        | 1        | 1        | 48        | 0                          |
| BHT14_PBSA_del1     | Desulfobacterota | Desulfobulbia        | Desulfobulbales         | Desulfocapsaceae          |                      | 45.1%       | 4,989,220        | 63,495                | 202         | 165           | 97.3             | 1.2               | 1        | 1        | 1        | 38        | 1                          |
| BHT14_PCL_del1      | Desulfobacterota | Desulfobacteria      | Desulfobacterales       | Desulfobacteraceae        | <b>Desulfobacula</b> | 39.2%       | 4,465,880        | 30,302                | 327         | 311           | 95.6             | 3.3               | 2        | 1        | 1        | 41        | 1                          |
| PJM12_PCL_del1      | Desulfobacterota | Desulfobacteria      | Desulfobacterales       | Desulfobacteraceae        |                      | 42.3%       | 5,169,573        | 166,481               | 83          | 75            | 99.0             | 0.7               | 1        | 1        | 1        | 41        | 1                          |
| BHT04_PCL_alp1      | Proteobacteria   | Alphaproteobacteria  | Caulobacterales         | Hyphomonadaceae           | <b>Hyphomonas</b>    | 54.2%       | 3,277,584        | 404,467               | 10          | 10            | 98.7             | 2.2               | 1        | 1        | 1        | 36        | 0                          |
| BHT04_PBSA_alp1     | Proteobacteria   | Alphaproteobacteria  | Rhodobacterales         | Rhodobacteraceae          | Marinosulfonomonas   | 54.0%       | 3,767,685        | 224,990               | 45          | 43            | 99.7             | 0.3               | 1        | 1        | 1        | 40        | 0                          |
| BHT04_PBAT_alp2     | Proteobacteria   | Alphaproteobacteria  | Rhodobacterales         | Rhodobacteraceae          | Sulfitobacter        | 52.9%       | 4,833,856        | 220,187               | 64          | 61            | 99.4             | 1.5               | 1        | 1        | 0        | 39        | 0                          |
| AMN13_PHB_alp1      | Proteobacteria   | Alphaproteobacteria  | Micavibrionales         | <b>Micavibrionaceae</b>   | UBA1672              | 44.3%       | 2,505,412        | 609,558               | 16          | 14            | 94.4             | 1.5               | 1        | 2        | 2        | 34        | 1                          |
| PJM02_PBAT_act1     | Actinobacteriota | Acidimicrobiia       | <b>Acidimicrobiales</b> | SZUA-35                   | SZUA-35              | 70.4%       | 4,238,728        | 27,009                | 376         | 296           | 97.3             | 1.3               | 1        | 1        | 1        | 36        | 1                          |

Supplementary Table 10. Information of raw sequence data for 16S rRNA gene amplicon sequencing and metagenomic sequencing.

| Sample Name   | DRA Submission<br>(16S rRNA gene amplicon sequencing) |              |                |            | WGA Submission<br>(metagenomic sequencing) |             |              |                |             |
|---------------|-------------------------------------------------------|--------------|----------------|------------|--------------------------------------------|-------------|--------------|----------------|-------------|
|               | BioProject                                            | BioSample    | DRA Submission | Experiment | Run                                        | BioProject  | BioSample    | SRA Submission | Run         |
|               |                                                       |              |                |            |                                            |             |              |                |             |
| PHB_PJM02     | PRJDB14280                                            | SAMD00529542 | DRA014821      | DRX389282  | DRR403672                                  | PRJNA886482 | SAMN31142920 | SRP468711      | SRR26541478 |
| PHBV_PJM02    | PRJDB14280                                            | SAMD00529543 | DRA014821      | DRX389283  | DRR403673                                  | PRJNA886482 | SAMN31142921 | SRP468711      | SRR26541477 |
| PHBH_PJM02    | PRJDB14280                                            | SAMD00529544 | DRA014821      | DRX389284  | DRR403674                                  | PRJNA886482 | SAMN31142922 | SRP468711      | SRR26541466 |
| P3HB4HB_PJM02 | PRJDB14280                                            | SAMD00529545 | DRA014821      | DRX389285  | DRR403675                                  | PRJNA886482 | SAMN31142923 | SRP468711      | SRR26541455 |
| PBSA_PJM02    | PRJDB14280                                            | SAMD00529546 | DRA014821      | DRX389286  | DRR403676                                  | PRJNA886482 | SAMN31142924 | SRP468711      | SRR26541444 |
| PCL_PJM02     | PRJDB14280                                            | SAMD00529547 | DRA014821      | DRX389287  | DRR403677                                  | PRJNA886482 | SAMN31142925 | SRP468711      | SRR26541433 |
| PBAT_PJM02    | PRJDB14280                                            | SAMD00529548 | DRA014821      | DRX389288  | DRR403678                                  | PRJNA886482 | SAMN31142926 | SRP468711      | SRR26541423 |
| PLLA_PJM02    | PRJDB14280                                            | SAMD00529549 | DRA014821      | DRX389289  | DRR403679                                  | PRJNA886482 | SAMN31142927 | SRP468711      | SRR26541422 |
| PET_PJM02     | PRJDB14280                                            | SAMD00529550 | DRA014821      | DRX389290  | DRR403680                                  | PRJNA886482 | SAMN31142928 | SRP468711      | SRR26541421 |
| PE_PJM02      | PRJDB14280                                            | SAMD00529551 | DRA014821      | DRX389291  | DRR403681                                  | PRJNA886482 | SAMN31142929 | SRP468711      | SRR26541420 |
| PS_PJM02      | PRJDB14280                                            | SAMD00529552 | DRA014821      | DRX389292  | DRR403682                                  | PRJNA886482 | SAMN31142930 | SRP468711      | SRR26541476 |
| PP_PJM02      | PRJDB14280                                            | SAMD00529553 | DRA014821      | DRX389293  | DRR403683                                  | PRJNA886482 | SAMN31142931 | SRP468711      | SRR26541475 |
| CEA_PJM02     | PRJDB14280                                            | SAMD00529554 | DRA014821      | DRX389294  | DRR403684                                  | na          | na           | na             | na          |
| PRA_PJM02     | PRJDB14280                                            | SAMD00529555 | DRA014821      | DRX389295  | DRR403685                                  | na          | na           | na             | na          |
| MUA_PJM02     | PRJDB14280                                            | SAMD00529556 | DRA014821      | DRX389296  | DRR403686                                  | na          | na           | na             | na          |
| CETA_PJM02    | PRJDB14280                                            | SAMD00529557 | DRA014821      | DRX389297  | DRR403687                                  | na          | na           | na             | na          |
| PRTA_PJM02    | PRJDB14280                                            | SAMD00529558 | DRA014821      | DRX389298  | DRR403688                                  | na          | na           | na             | na          |
| MUTA_PJM02    | PRJDB14280                                            | SAMD00529559 | DRA014821      | DRX389299  | DRR403689                                  | na          | na           | na             | na          |
| PHB_PJM12     | PRJDB14280                                            | SAMD00529560 | DRA014821      | DRX389300  | DRR403690                                  | PRJNA886482 | SAMN31142932 | SRP468711      | SRR26541474 |
| PHBV_PJM12    | PRJDB14280                                            | SAMD00529561 | DRA014821      | DRX389301  | DRR403691                                  | PRJNA886482 | SAMN31142933 | SRP468711      | SRR26541473 |
| PHBH_PJM12    | PRJDB14280                                            | SAMD00529562 | DRA014821      | DRX389302  | DRR403692                                  | PRJNA886482 | SAMN31142934 | SRP468711      | SRR26541472 |
| P3HB4HB_PJM12 | PRJDB14280                                            | SAMD00529563 | DRA014821      | DRX389303  | DRR403693                                  | PRJNA886482 | SAMN31142935 | SRP468711      | SRR26541471 |
| PBSA_PJM12    | PRJDB14280                                            | SAMD00529564 | DRA014821      | DRX389304  | DRR403694                                  | PRJNA886482 | SAMN31142936 | SRP468711      | SRR26541470 |
| PCL_PJM12     | PRJDB14280                                            | SAMD00529565 | DRA014821      | DRX389305  | DRR403695                                  | PRJNA886482 | SAMN31142937 | SRP468711      | SRR26541469 |
| PBAT_PJM12    | PRJDB14280                                            | SAMD00529566 | DRA014821      | DRX389306  | DRR403696                                  | PRJNA886482 | SAMN31142938 | SRP468711      | SRR26541468 |
| PLLA_PJM12    | PRJDB14280                                            | SAMD00529567 | DRA014821      | DRX389307  | DRR403697                                  | PRJNA886482 | SAMN31142939 | SRP468711      | SRR26541467 |
| PE_PJM12      | PRJDB14280                                            | SAMD00529568 | DRA014821      | DRX389308  | DRR403698                                  | PRJNA886482 | SAMN31142940 | SRP468711      | SRR26541466 |
| PS_PJM12      | PRJDB14280                                            | SAMD00529569 | DRA014821      | DRX389309  | DRR403699                                  | PRJNA886482 | SAMN31142941 | SRP468711      | SRR26541465 |
| PP_PJM12      | PRJDB14280                                            | SAMD00529570 | DRA014821      | DRX389310  | DRR403700                                  | PRJNA886482 | SAMN31142942 | SRP468711      | SRR26541464 |
| CE_PJM12      | PRJDB14280                                            | SAMD00529571 | DRA014821      | DRX389311  | DRR403701                                  | na          | na           | na             | na          |
| PR_PJM12      | PRJDB14280                                            | SAMD00529572 | DRA014821      | DRX389312  | DRR403702                                  | na          | na           | na             | na          |
| MU_PJM12      | PRJDB14280                                            | SAMD00529573 | DRA014821      | DRX389313  | DRR403703                                  | na          | na           | na             | na          |
| CEA_PJM12     | PRJDB14280                                            | SAMD00529574 | DRA014821      | DRX389314  | DRR403704                                  | na          | na           | na             | na          |
| PRA_PJM12     | PRJDB14280                                            | SAMD00529575 | DRA014821      | DRX389315  | DRR403705                                  | na          | na           | na             | na          |
| MUA_PJM12     | PRJDB14280                                            | SAMD00529576 | DRA014821      | DRX389316  | DRR403706                                  | na          | na           | na             | na          |
| CETA_PJM12    | PRJDB14280                                            | SAMD00529577 | DRA014821      | DRX389317  | DRR403707                                  | na          | na           | na             | na          |
| PRTA_PJM12    | PRJDB14280                                            | SAMD00529578 | DRA014821      | DRX389318  | DRR403708                                  | na          | na           | na             | na          |
| MUTA_PJM12    | PRJDB14280                                            | SAMD00529579 | DRA014821      | DRX389319  | DRR403709                                  | na          | na           | na             | na          |
| PHB_BHT04     | PRJDB14280                                            | SAMD00529580 | DRA014821      | DRX389320  | DRR403710                                  | PRJNA886482 | SAMN31142943 | SRP468711      | SRR26541462 |
| PHBV_BHT04    | PRJDB14280                                            | SAMD00529581 | DRA014821      | DRX389321  | DRR403711                                  | PRJNA886482 | SAMN31142944 | SRP468711      | SRR26541461 |
| PHBH_BHT04    | PRJDB14280                                            | SAMD00529582 | DRA014821      | DRX389322  | DRR403712                                  | PRJNA886482 | SAMN31142945 | SRP468711      | SRR26541460 |
| P3HB4HB_BHT04 | PRJDB14280                                            | SAMD00529583 | DRA014821      | DRX389323  | DRR403713                                  | PRJNA886482 | SAMN31142946 | SRP468711      | SRR26541459 |
| PBSA_BHT04    | PRJDB14280                                            | SAMD00529584 | DRA014821      | DRX389324  | DRR403714                                  | PRJNA886482 | SAMN31142947 | SRP468711      | SRR26541458 |
| PCL_BHT04     | PRJDB14280                                            | SAMD00529585 | DRA014821      | DRX389325  | DRR403715                                  | PRJNA886482 | SAMN31142948 | SRP468711      | SRR26541457 |
| PBAT_BHT04    | PRJDB14280                                            | SAMD00529586 | DRA014821      | DRX389326  | DRR403716                                  | PRJNA886482 | SAMN31142949 | SRP468711      | SRR26541456 |
| PET_BHT04     | PRJDB14280                                            | SAMD00529587 | DRA014821      | DRX389327  | DRR403717                                  | PRJNA886482 | SAMN31142950 | SRP468711      | SRR26541455 |
| PE_BHT04      | PRJDB14280                                            | SAMD00529588 | DRA014821      | DRX389328  | DRR403718                                  | PRJNA886482 | SAMN31142951 | SRP468711      | SRR26541454 |
| PS_BHT04      | PRJDB14280                                            | SAMD00529589 | DRA014821      | DRX389329  | DRR403719                                  | PRJNA886482 | SAMN31142952 | SRP468711      | SRR26541453 |
| PP_BHT04      | PRJDB14280                                            | SAMD00529590 | DRA014821      | DRX389330  | DRR403720                                  | PRJNA886482 | SAMN31142953 | SRP468711      | SRR26541452 |
| CE_BHT04      | PRJDB14280                                            | SAMD00529591 | DRA014821      | DRX389331  | DRR403721                                  | PRJNA886482 | SAMN31142954 | SRP468711      | SRR26541451 |
| PR_BHT04      | PRJDB14280                                            | SAMD00529592 | DRA014821      | DRX389332  | DRR403722                                  | na          | na           | na             | na          |
| MU_BHT04      | PRJDB14280                                            | SAMD00529593 | DRA014821      | DRX389333  | DRR403723                                  | na          | na           | na             | na          |
| CEA_BHT04     | PRJDB14280                                            | SAMD00529594 | DRA014821      | DRX389334  | DRR403724                                  | na          | na           | na             | na          |
| PRA_BHT04     | PRJDB14280                                            | SAMD00529595 | DRA014821      | DRX389335  | DRR403725                                  | na          | na           | na             | na          |
| MUA_BHT04     | PRJDB14280                                            | SAMD00529596 | DRA014821      | DRX389336  | DRR403726                                  | na          | na           | na             | na          |
| CETA_BHT04    | PRJDB14280                                            | SAMD00529597 | DRA014821      | DRX389337  | DRR403727                                  | na          | na           | na             | na          |
| PRTA_BHT04    | PRJDB14280                                            | SAMD00529598 | DRA014821      | DRX389338  | DRR403728                                  | na          | na           | na             | na          |
| MUTA_BHT04    | PRJDB14280                                            | SAMD00529599 | DRA014821      | DRX389339  | DRR403729                                  | na          | na           | na             | na          |
| PHB_BHT14     | PRJDB14280                                            | SAMD00529600 | DRA014821      | DRX389340  | DRR403730                                  | na          | na           | na             | na          |
| PHBV_BHT14    | PRJDB14280                                            | SAMD00529601 | DRA014821      | DRX389341  | DRR403731                                  | PRJNA886482 | SAMN31142955 | SRP468711      | SRR26541449 |
| PHBH_BHT14    | PRJDB14280                                            | SAMD00529602 | DRA014821      | DRX389342  | DRR403732                                  | PRJNA886482 | SAMN31142956 | SRP468711      | SRR26541448 |
| P3HB4HB_BHT14 | PRJDB14280                                            | SAMD00529603 | DRA014821      | DRX389343  | DRR403733                                  | PRJNA886482 | SAMN31142957 | SRP468711      | SRR26541447 |
| PBSA_BHT14    | PRJDB14280                                            | SAMD00529604 | DRA014821      | DRX389344  | DRR403734                                  | PRJNA886482 | SAMN31142958 | SRP468711      | SRR26541446 |
| PCL_BHT14     | PRJDB14280                                            | SAMD00529605 | DRA014821      | DRX389345  | DRR403735                                  | PRJNA886482 | SAMN31142959 | SRP468711      | SRR26541445 |
| PBAT_BHT14    | PRJDB14280                                            | SAMD00529606 | DRA014821      | DRX389346  | DRR403736                                  | PRJNA886482 | SAMN31142960 | SRP468711      | SRR26541444 |
| PET_BHT14     | PRJDB14280                                            | SAMD00529607 | DRA014821      | DRX389347  | DRR403737                                  | PRJNA886482 | SAMN31142961 | SRP468711      | SRR26541443 |
| PE_BHT14      | PRJDB14280                                            | SAMD00529608 | DRA014821      | DRX389348  | DRR403738                                  | PRJNA886482 | SAMN31142962 | SRP468711      | SRR26541442 |
| PS_BHT14      | PRJDB14280                                            | SAMD00529609 | DRA014821      | DRX389349  | DRR403739                                  | PRJNA886482 | SAMN31142963 | SRP468711      | SRR26541441 |
| PP_BHT14      | PRJDB14280                                            | SAMD00529610 | DRA014821      | DRX389350  | DRR403740                                  | PRJNA886482 | SAMN31142964 | SRP468711      | SRR26541440 |
| CE_BHT14      | PRJDB14280                                            | SAMD00529611 | DRA014821      | DRX389351  | DRR403741                                  | PRJNA886482 | SAMN31142965 | SRP468711      | SRR26541439 |
| PR_BHT14      | PRJDB14280                                            | SAMD00529612 | DRA014821      | DRX389352  | DRR403742                                  | PRJNA886482 | SAMN31142966 | SRP468711      | SRR26541438 |
| MU_BHT14      | PRJDB14280                                            | SAMD00529613 | DRA014821      | DRX389353  | DRR403743                                  | na          | na           | na             | na          |
| CEA_BHT14     | PRJDB14280                                            | SAMD00529614 | DRA014821      | DRX389354  | DRR403744                                  | na          | na           | na             | na          |
| PRA_BHT14     | PRJDB14280                                            | SAMD00529615 | DRA014821      | DRX389355  | DRR403745                                  | na          | na           | na             | na          |
| MUA_BHT14     | PRJDB14280                                            | SAMD00529616 | DRA014821      | DRX389356  | DRR403746                                  | na          | na           | na             | na          |
| CETA_BHT14    | PRJDB14280                                            | SAMD00529617 | DRA014821      | DRX389357  | DRR403747                                  | na          | na           | na             | na          |
| PRTA_BHT14    | PRJDB14280                                            | SAMD00529618 | DRA014821      | DRX389358  | DRR403748                                  | na          | na           | na             | na          |
| MUTA_BHT14    | PRJDB14280                                            | SAMD00529619 | DRA014821      | DRX389359  | DRR403749                                  | na          | na           | na             | na          |
| PHB_AMN13     | PRJDB14280                                            | SAMD00529620 | DRA014821      | DRX389360  | DRR403750                                  | na          | na           | na             | na          |
| PHBV_AMN13    | PRJDB14280                                            | SAMD00529621 | DRA014821      | DRX389361  | DRR403751                                  | na          | na           | na             | na          |
| PHBH_AMN13    | PRJDB14280                                            | SAMD00529622 | DRA014821      | DRX389362  | DRR403752                                  | PRJNA886482 | SAMN31142967 | SRP468711      | SRR26541436 |
| P3HB4HB_AMN13 | PRJDB14280                                            | SAMD00529623 | DRA014821      | DRX389363  | DRR403753                                  | PRJNA886482 | SAMN31142968 | SRP468711      | SRR26541435 |
| PBSA_AMN13    | PRJDB14280                                            | SAMD00529624 | DRA014821      | DRX389364  | DRR403754                                  | PRJNA886482 | SAMN31142969 | SRP468711      | SRR26541434 |
| PCL_AMN13     | PRJDB14280                                            | SAMD00529625 | DRA014821      | DRX389365  | DRR403755                                  | PRJNA886482 | SAMN31142970 | SRP468711      | SRR26541433 |
| PBAT_AMN13    | PRJDB14280                                            | SAMD00529626 | DRA014821      | DRX389366  | DRR403756                                  | PRJNA886482 | SAMN31142971 | SRP468711      | SRR26541432 |
| PET_AMN13     | PRJDB14280                                            | SAMD00529627 | DRA014821      | DRX389367  | DRR403757                                  | PRJNA886482 | SAMN31142972 | SRP468711      | SRR26541431 |
| PE_AMN13      | PRJDB14280                                            | SAMD00529628 | DRA014821      | DRX389368  | DRR403758                                  | PRJNA886482 | SAMN31142973 | SRP468711      | SRR26541430 |
| PS_AMN13      | PRJDB14280                                            | SAMD00529629 | DRA014821      | DRX389369  | DRR403759                                  | PRJNA886482 | SAMN31142974 | SRP468711      | SRR26541429 |
| PP_AMN13      | PRJDB14280                                            | SAMD00529630 | DRA014821      | DRX389370  | DRR403760                                  | PRJNA886482 | SAMN31142975 | SRP468711      | SRR26541428 |
| CE_AMN13      | PRJDB14280                                            | SAMD00529631 | DRA014821      | DRX389371  | DRR403761                                  | PRJNA886482 | SAMN31142976 | SRP468711      | SRR26541427 |
| PRA_AMN13     | PRJDB14280                                            | SAMD00529632 | DRA014821      | DRX389372  | DRR403762                                  | PRJNA886482 | SAMN31142977 | SRP468711      | SRR26541426 |
| MUA_AMN13     | PRJDB14280                                            | SAMD00529633 | DRA014821      | DRX389373  | DRR403763                                  | PRJNA886482 | SAMN31142978 | SRP468711      | SRR26541425 |
| CETA_AMN13    | PRJDB14280                                            | SAMD00529634 | DRA014821      | DRX389374  | DRR403764                                  | na          | na           | na             | na          |
| PRTA_AMN13    | PRJDB14280                                            | SAMD00529635 | DRA014821      | DRX389375  | DRR403765                                  | na          | na           | na             | na          |
| MUTA_AMN13    | PRJDB14280                                            | SAMD00529636 | DRA014821      | DRX389376  | DRR403766                                  | na          | na           | na             | na          |
| PHB_AMN13     | PRJDB14280                                            | SAMD00529637 | DRA014821      | DRX389377  | DRR403767                                  | na          | na           | na             | na          |
| PHBV_AMN13    | PRJDB14280                                            | SAMD00529638 | DRA014821      | DRX389378  | DRR403768                                  | na          | na           | na             | na          |
