# Supplementary material for: Microbial decomposition of biodegradable plastics on the deep-sea floor
Source: PubMed Central journal article supplement (PMC10817984; doi:10.1038/s41467-023-44368-8), 2024-01-26
Supplement: 41467_2023_44368_MOESM3_ESM.pdf [file 41467_2023_44368_MOESM3_ESM.pdf]

## **Description of Additional Supplementary Files:**

**Supplementary Data 1:** Biodegradation test for film samples.

**Supplementary Data 2:** BOD test for PHBH and cellulose.

**Supplementary Data 3:** Biodegradation test for injection-molded samples.

**Supplementary Data 4:** Relative frequency of ASV within each plastisphere and the taxonomic assignment.

**Supplementary Data 5:** Taxonomic classification of RpsC sequences within the metagenomes of plastispheres established at the sea.

**Supplementary Data 6:** RpsC-based relative frequency (%) based on genus level taxa within plastispheres established at the sea.

**Supplementary Data 7:** Raw Data. RpsC-based relative frequency (%) based on genus level taxa within plastispheres established at the sea.

**Supplementary Data 8:** Taxonomic classification of RpsC sequences within the metagenomes of plastispheres established at the sea.

**Supplementary Data 9:** List of MAG-associated scaffolds and coverages of the scaffolds mapped by different metagenomic reads.
